# Supplementary material
Source: publisher figshare collection journal article supplement (https://acs.figshare.com/ndownloader/files/4196116)
Supplement: Supplementary file 1 [file 4196116]

data_added_by_encifer
_publ_requested_journal          Inorg.Chem.
_publ_contact_author_name        'Ulrich Abram'
_publ_contact_author_address     
;Freie Universit\"at Berlin, Institute of 
Chemistry and Biochemistry, Fabeckstr. 34-36,
 D-14195 Berlin, Germany
;
_publ_contact_author_email       abram@chemie.fu-berlin.de
_publ_contact_author_phone       '(#49) 30 83854002'
_publ_contact_author_fax         '(#49) 30 83852676'
loop_
_publ_author_name
_publ_author_address
'da Silva Maia, Pedro Ivo'
;Instituto de Qu\'imica de S\~ao Carlos,
 Universidade de S\~ao Paulo, CP 780,
 S\~ao Carlos - SP, Brazil
;
'Hung Huy, Nguyen'
;Department of Chemistry, Hanoi University 
of Sciences, 19 Le Thanh Tong, 
Hanoi, Vietnam
;
'Ponader, Daniela'
;Freie Universit\"at Berlin, Institute of 
Chemistry and Biochemistry, Fabeckstr. 34-36, 
D-14195 Berlin, Germany
;
'Hagenbach, Adelheid'
;Freie Universit\"at Berlin, Institute of 
Chemistry and Biochemistry, Fabeckstr. 34-36, 
D-14195 Berlin, Germany
;
'Bergeman, Silke'
;Freie Universit\"at Berlin, 
Institute of Pharmacy, Germany
;
'Gust, Ronald'
;Freie Universit\"at Berlin, I
nstitute of Pharmacy, Germany
;
'Deflon, Victor Marcelo'
;Instituto de Qu\'imica de S\~ao Carlos, 
Universidade de S\~ao Paulo, CP 780, 
S\~ao Carlos - SP, Brazil
;
'Abram, Ulrich'
;Freie Universit\"at Berlin, Institute of 
Chemistry and Biochemistry, Fabeckstr. 34-36,
D-14195 Berlin, Germany
;


data_aul4ccl
_audit_creation_method           SHELXL-97
_chemical_name_systematic        
;
'Chloro[N-{2N-(5-diethylamino-3-phenyl-1-thiocarbamoyl-1,2,4-triazole)}{N'-
(hexaamethylene)}thiourea]gold(I) 
gold(III) Chloride'  
;
_chemical_name_common            '[Au(I)Cl(DPTT)]'
_chemical_melting_point          ?
_chemical_formula_moiety         'C19 H27 Au Cl N5 S'
_chemical_formula_sum            'C19 H27 Au Cl N5 S'
_chemical_formula_weight         589.93

loop_
_atom_type_symbol
_atom_type_description
_atom_type_scat_dispersion_real
_atom_type_scat_dispersion_imag
_atom_type_scat_source
C C 0.0033 0.0016 'International Tables Vol C Tables 4.2.6.8 and 6.1.1.4'
H H 0.0000 0.0000 'International Tables Vol C Tables 4.2.6.8 and 6.1.1.4'
Au Au -2.0133 8.8022 'International Tables Vol C Tables 4.2.6.8 and 6.1.1.4'
Cl Cl 0.1484 0.1585 'International Tables Vol C Tables 4.2.6.8 and 6.1.1.4'
N N 0.0061 0.0033 'International Tables Vol C Tables 4.2.6.8 and 6.1.1.4'
S S 0.1246 0.1234 'International Tables Vol C Tables 4.2.6.8 and 6.1.1.4'

_symmetry_cell_setting           monoclinic
_symmetry_space_group_name_H-M   'P 21/n'


loop_
_symmetry_equiv_pos_as_xyz
'x, y, z'
'-x+1/2, y+1/2, -z+1/2'
'-x, -y, -z'
'x-1/2, -y-1/2, z-1/2'

_cell_length_a                   8.0871(7)
_cell_length_b                   23.774(1)
_cell_length_c                   11.614(1)
_cell_angle_alpha                90.00
_cell_angle_beta                 106.44(1)
_cell_angle_gamma                90.00
_cell_volume                     2141.7(3)
_cell_formula_units_Z            4
_cell_measurement_temperature    200(2)
_cell_measurement_reflns_used    15987
_cell_measurement_theta_min      2.50
_cell_measurement_theta_max      29.61


_exptl_crystal_description       needles
_exptl_crystal_colour            colorless
_exptl_crystal_size_max          0.15
_exptl_crystal_size_mid          0.1
_exptl_crystal_size_min          0.07
_exptl_crystal_density_meas      ?
_exptl_crystal_density_diffrn    1.830
_exptl_crystal_density_method    'not measured'
_exptl_crystal_F_000             1152
_exptl_absorpt_coefficient_mu    7.105
_exptl_absorpt_correction_type   integration
_exptl_absorpt_correction_T_min  0.2311
_exptl_absorpt_correction_T_max  0.4632
_exptl_absorpt_process_details   ?

_exptl_special_details           
;
 'X-RED'
;

_diffrn_ambient_temperature      200(2)
_diffrn_radiation_wavelength     0.71073
_diffrn_radiation_type           MoK\a
_diffrn_radiation_source         'fine-focus sealed tube'
_diffrn_radiation_monochromator  graphite
_diffrn_measurement_device_type  'STOE IPDS 2T'
_diffrn_measurement_method       'rotation method'
_diffrn_detector_area_resol_mean 6.67
_diffrn_standards_number         ?
_diffrn_standards_interval_count ?
_diffrn_standards_interval_time  ?
_diffrn_standards_decay_%        ?
_diffrn_reflns_number            16009
_diffrn_reflns_av_R_equivalents  0.0588
_diffrn_reflns_av_sigmaI/netI    0.0416
_diffrn_reflns_limit_h_min       -11
_diffrn_reflns_limit_h_max       9
_diffrn_reflns_limit_k_min       -32
_diffrn_reflns_limit_k_max       32
_diffrn_reflns_limit_l_min       -14
_diffrn_reflns_limit_l_max       15
_diffrn_reflns_theta_min         1.71
_diffrn_reflns_theta_max         29.22
_reflns_number_total             5757
_reflns_number_gt                4604
_reflns_threshold_expression     >2sigma(I)

_computing_data_collection       'STOE X-AREA'
_computing_cell_refinement       'STOE X-AREA'
_computing_data_reduction        'STOE X-RED'
_computing_structure_solution    'SHELXS-97 (Sheldrick, 1997)'
_computing_structure_refinement  'SHELXL-97 (Sheldrick, 1997)'
_computing_molecular_graphics    'Ortep-3 for Windows (Farrugia, 1997)'
_computing_publication_material  'WinGX publication routines (Farrugia, 1999)'


_refine_special_details          
;
 Refinement of F^2^ against ALL reflections.  The weighted R-factor wR and
 goodness of fit S are based on F^2^, conventional R-factors R are based
 on F, with F set to zero for negative F^2^. The threshold expression of
 F^2^ > 2sigma(F^2^) is used only for calculating R-factors(gt) etc. and is
 not relevant to the choice of reflections for refinement.  R-factors based
 on F^2^ are statistically about twice as large as those based on F, and R-
 factors based on ALL data will be even larger.
;

_refine_ls_structure_factor_coef Fsqd
_refine_ls_matrix_type           full
_refine_ls_weighting_scheme      calc
_refine_ls_weighting_details     
'calc w=1/[\s^2^(Fo^2^)+(0.0541P)^2^+0.0000P] where P=(Fo^2^+2Fc^2^)/3'
_atom_sites_solution_primary     direct
_atom_sites_solution_secondary   difmap
_atom_sites_solution_hydrogens   geom
_refine_ls_hydrogen_treatment    constr
_refine_ls_extinction_method     SHELXL
_refine_ls_extinction_coef       0.0112(4)
_refine_ls_extinction_expression Fc^*^=kFc[1+0.001xFc^2^\l^3^/sin(2\q)]^-1/4^
_refine_ls_number_reflns         5757
_refine_ls_number_parameters     247
_refine_ls_number_restraints     0
_refine_ls_R_factor_all          0.0497
_refine_ls_R_factor_gt           0.0345
_refine_ls_wR_factor_ref         0.0946
_refine_ls_wR_factor_gt          0.0776
_refine_ls_goodness_of_fit_ref   1.089
_refine_ls_restrained_S_all      1.089
_refine_ls_shift/su_max          0.020
_refine_ls_shift/su_mean         0.000

loop_
_atom_site_label
_atom_site_type_symbol
_atom_site_fract_x
_atom_site_fract_y
_atom_site_fract_z
_atom_site_U_iso_or_equiv
_atom_site_adp_type
_atom_site_occupancy
_atom_site_symmetry_multiplicity
_atom_site_calc_flag
_atom_site_refinement_flags
_atom_site_disorder_assembly
_atom_site_disorder_group
Au Au 0.95377(2) 0.949782(7) 0.595565(16) 0.04055(9) Uani 1 1 d . . .
S2 S 0.66851(16) 0.93983(5) 0.50486(12) 0.0421(2) Uani 1 1 d . . .
Cl Cl 1.23646(17) 0.96238(7) 0.69508(14) 0.0592(3) Uani 1 1 d . . .
N1 N 0.9445(5) 0.81350(17) 0.7721(3) 0.0401(8) Uani 1 1 d . . .
N2 N 0.7420(5) 0.79352(15) 0.5970(3) 0.0396(8) Uani 1 1 d . . .
N3 N 0.7080(5) 0.84537(15) 0.6428(3) 0.0382(8) Uani 1 1 d . . .
N4 N 0.4325(5) 0.86630(15) 0.5242(3) 0.0349(7) Uani 1 1 d . . .
N5 N 0.8401(5) 0.90282(17) 0.8159(3) 0.0430(9) Uani 1 1 d . . .
C1 C 0.8342(5) 0.85622(19) 0.7487(4) 0.0373(9) Uani 1 1 d . . .
C2 C 0.8839(6) 0.77746(19) 0.6779(4) 0.0375(9) Uani 1 1 d . . .
C3 C 0.5959(6) 0.88135(18) 0.5609(4) 0.0360(9) Uani 1 1 d . . .
C21 C 0.9639(6) 0.7225(2) 0.6697(4) 0.0413(10) Uani 1 1 d . . .
C22 C 0.8992(7) 0.6879(2) 0.5713(5) 0.0468(11) Uani 1 1 d . . .
H22 H 0.8080 0.7000 0.5077 0.056 Uiso 1 1 calc R . .
C23 C 0.9704(8) 0.6350(2) 0.5678(7) 0.0614(14) Uani 1 1 d . . .
H23 H 0.9270 0.6116 0.5020 0.074 Uiso 1 1 calc R . .
C24 C 1.1064(8) 0.6171(2) 0.6628(7) 0.0653(17) Uani 1 1 d . . .
H24 H 1.1542 0.5817 0.6607 0.078 Uiso 1 1 calc R . .
C25 C 1.1696(7) 0.6511(3) 0.7583(6) 0.0599(15) Uani 1 1 d . . .
H25 H 1.2604 0.6386 0.8218 0.072 Uiso 1 1 calc R . .
C26 C 1.1021(7) 0.7043(2) 0.7639(5) 0.0521(12) Uani 1 1 d . . .
H26 H 1.1484 0.7276 0.8295 0.063 Uiso 1 1 calc R . .
C41 C 0.3586(6) 0.82154(19) 0.5830(4) 0.0412(9) Uani 1 1 d . . .
H41A H 0.2549 0.8358 0.5992 0.049 Uiso 1 1 calc R . .
H41B H 0.4404 0.8124 0.6595 0.049 Uiso 1 1 calc R . .
C42 C 0.3138(7) 0.76768(19) 0.5084(5) 0.0461(11) Uani 1 1 d . . .
H42A H 0.4051 0.7599 0.4715 0.055 Uiso 1 1 calc R . .
H42B H 0.3099 0.7366 0.5616 0.055 Uiso 1 1 calc R . .
C43 C 0.1437(7) 0.7703(2) 0.4108(5) 0.0470(11) Uani 1 1 d . . .
H43A H 0.0516 0.7746 0.4485 0.056 Uiso 1 1 calc R . .
H43B H 0.1259 0.7347 0.3683 0.056 Uiso 1 1 calc R . .
C44 C 0.1296(7) 0.8174(2) 0.3198(4) 0.0438(10) Uani 1 1 d . . .
H44A H 0.2231 0.8139 0.2833 0.053 Uiso 1 1 calc R . .
H44B H 0.0220 0.8134 0.2568 0.053 Uiso 1 1 calc R . .
C45 C 0.1361(6) 0.8757(2) 0.3751(4) 0.0410(10) Uani 1 1 d . . .
H45A H 0.0805 0.8741 0.4388 0.049 Uiso 1 1 calc R . .
H45B H 0.0698 0.9013 0.3143 0.049 Uiso 1 1 calc R . .
C46 C 0.3167(6) 0.90008(18) 0.4263(4) 0.0400(9) Uani 1 1 d . . .
H46A H 0.3700 0.9037 0.3617 0.048 Uiso 1 1 calc R . .
H46B H 0.3063 0.9375 0.4566 0.048 Uiso 1 1 calc R . .
C51 C 0.6829(7) 0.9291(2) 0.8253(5) 0.0529(12) Uani 1 1 d . . .
H51A H 0.6571 0.9152 0.8968 0.063 Uiso 1 1 calc R . .
H51B H 0.5886 0.9181 0.7565 0.063 Uiso 1 1 calc R . .
C52 C 0.6935(10) 0.9918(3) 0.8308(9) 0.092(3) Uani 1 1 d . . .
H52A H 0.7655 1.0032 0.9081 0.138 Uiso 1 1 calc R . .
H52B H 0.5801 1.0072 0.8185 0.138 Uiso 1 1 calc R . .
H52C H 0.7418 1.0054 0.7694 0.138 Uiso 1 1 calc R . .
C53 C 0.9983(7) 0.9120(2) 0.9138(4) 0.0455(10) Uani 1 1 d . . .
H53A H 1.0174 0.9521 0.9253 0.055 Uiso 1 1 calc R . .
H53B H 1.0949 0.8964 0.8905 0.055 Uiso 1 1 calc R . .
C54 C 0.9945(8) 0.8860(3) 1.0316(5) 0.0626(15) Uani 1 1 d . . .
H54A H 0.9137 0.9060 1.0630 0.094 Uiso 1 1 calc R . .
H54B H 1.1072 0.8882 1.0876 0.094 Uiso 1 1 calc R . .
H54C H 0.9602 0.8473 1.0190 0.094 Uiso 1 1 calc R . .

loop_
_atom_site_aniso_label
_atom_site_aniso_U_11
_atom_site_aniso_U_22
_atom_site_aniso_U_33
_atom_site_aniso_U_23
_atom_site_aniso_U_13
_atom_site_aniso_U_12
Au 0.03339(11) 0.04157(11) 0.04462(12) -0.00267(7) 0.00767(7) -0.00488(7)
S2 0.0346(5) 0.0366(5) 0.0492(6) 0.0034(4) 0.0023(5) -0.0039(4)
Cl 0.0354(6) 0.0755(9) 0.0614(8) 0.0074(6) 0.0051(5) -0.0131(6)
N1 0.0332(19) 0.048(2) 0.0352(18) 0.0048(15) 0.0027(15) 0.0024(16)
N2 0.0356(19) 0.0368(18) 0.0391(19) 0.0021(14) -0.0010(15) 0.0034(15)
N3 0.0342(18) 0.0358(17) 0.0372(18) -0.0021(14) -0.0023(14) 0.0021(15)
N4 0.0324(18) 0.0354(17) 0.0311(16) 0.0024(13) -0.0005(14) -0.0021(14)
N5 0.0334(19) 0.051(2) 0.0380(19) -0.0069(16) -0.0007(15) -0.0067(16)
C1 0.030(2) 0.044(2) 0.0324(19) 0.0047(16) 0.0005(16) -0.0026(17)
C2 0.031(2) 0.043(2) 0.036(2) 0.0087(17) 0.0060(16) 0.0022(17)
C3 0.033(2) 0.035(2) 0.034(2) -0.0022(15) -0.0004(16) 0.0017(16)
C21 0.035(2) 0.044(2) 0.045(2) 0.0160(19) 0.0120(19) 0.0028(18)
C22 0.040(2) 0.043(2) 0.056(3) 0.008(2) 0.012(2) 0.007(2)
C23 0.051(3) 0.047(3) 0.089(4) 0.000(3) 0.024(3) 0.004(2)
C24 0.046(3) 0.046(3) 0.110(5) 0.018(3) 0.032(3) 0.015(2)
C25 0.037(3) 0.061(3) 0.084(4) 0.031(3) 0.022(3) 0.015(2)
C26 0.038(3) 0.062(3) 0.056(3) 0.018(2) 0.012(2) 0.008(2)
C41 0.037(2) 0.045(2) 0.036(2) 0.0048(17) 0.0017(18) -0.0032(19)
C42 0.046(3) 0.038(2) 0.051(3) 0.0041(19) 0.008(2) -0.0047(19)
C43 0.044(3) 0.045(2) 0.049(3) -0.006(2) 0.008(2) -0.008(2)
C44 0.039(2) 0.050(3) 0.038(2) -0.0049(19) 0.0051(19) -0.002(2)
C45 0.034(2) 0.048(2) 0.033(2) -0.0030(17) -0.0035(17) 0.0053(19)
C46 0.034(2) 0.037(2) 0.042(2) 0.0065(17) -0.0019(18) 0.0023(17)
C51 0.043(3) 0.061(3) 0.046(3) -0.017(2) 0.000(2) 0.000(2)
C52 0.070(5) 0.062(4) 0.123(7) -0.035(4) -0.006(5) 0.006(3)
C53 0.039(2) 0.054(3) 0.036(2) -0.0029(19) -0.0014(19) -0.008(2)
C54 0.059(3) 0.081(4) 0.041(3) 0.001(3) 0.003(2) -0.008(3)

_geom_special_details            
;
 All esds (except the esd in the dihedral angle between two l.s. planes)
 are estimated using the full covariance matrix.  The cell esds are taken
 into account individually in the estimation of esds in distances, angles
 and torsion angles; correlations between esds in cell parameters are only
 used when they are defined by crystal symmetry.  An approximate (isotropic)
 treatment of cell esds is used for estimating esds involving l.s. planes.
;

loop_
_geom_bond_atom_site_label_1
_geom_bond_atom_site_label_2
_geom_bond_distance
_geom_bond_site_symmetry_2
_geom_bond_publ_flag
Au S2 2.2610(12) . ?
Au Cl 2.2708(13) . ?
S2 C3 1.708(5) . ?
N1 C1 1.328(6) . ?
N1 C2 1.367(6) . ?
N2 C2 1.316(5) . ?
N2 N3 1.400(5) . ?
N3 C1 1.382(5) . ?
N3 C3 1.404(5) . ?
N4 C3 1.318(6) . ?
N4 C41 1.479(6) . ?
N4 C46 1.488(5) . ?
N5 C1 1.348(6) . ?
N5 C51 1.448(7) . ?
N5 C53 1.468(6) . ?
C2 C21 1.472(6) . ?
C21 C22 1.386(7) . ?
C21 C26 1.393(7) . ?
C22 C23 1.388(7) . ?
C22 H22 0.9300 . ?
C23 C24 1.385(9) . ?
C23 H23 0.9300 . ?
C24 C25 1.352(10) . ?
C24 H24 0.9300 . ?
C25 C26 1.386(8) . ?
C25 H25 0.9300 . ?
C26 H26 0.9300 . ?
C41 C42 1.531(6) . ?
C41 H41A 0.9700 . ?
C41 H41B 0.9700 . ?
C42 C43 1.516(7) . ?
C42 H42A 0.9700 . ?
C42 H42B 0.9700 . ?
C43 C44 1.523(7) . ?
C43 H43A 0.9700 . ?
C43 H43B 0.9700 . ?
C44 C45 1.522(6) . ?
C44 H44A 0.9700 . ?
C44 H44B 0.9700 . ?
C45 C46 1.527(6) . ?
C45 H45A 0.9700 . ?
C45 H45B 0.9700 . ?
C46 H46A 0.9700 . ?
C46 H46B 0.9700 . ?
C51 C52 1.495(9) . ?
C51 H51A 0.9700 . ?
C51 H51B 0.9700 . ?
C52 H52A 0.9600 . ?
C52 H52B 0.9600 . ?
C52 H52C 0.9600 . ?
C53 C54 1.508(7) . ?
C53 H53A 0.9700 . ?
C53 H53B 0.9700 . ?
C54 H54A 0.9600 . ?
C54 H54B 0.9600 . ?
C54 H54C 0.9600 . ?

loop_
_geom_angle_atom_site_label_1
_geom_angle_atom_site_label_2
_geom_angle_atom_site_label_3
_geom_angle
_geom_angle_site_symmetry_1
_geom_angle_site_symmetry_3
_geom_angle_publ_flag
S2 Au Cl 176.80(5) . . ?
C3 S2 Au 108.84(15) . . ?
C1 N1 C2 104.3(4) . . ?
C2 N2 N3 102.1(3) . . ?
C1 N3 N2 109.1(3) . . ?
C1 N3 C3 131.5(4) . . ?
N2 N3 C3 115.9(3) . . ?
C3 N4 C41 123.1(4) . . ?
C3 N4 C46 117.2(4) . . ?
C41 N4 C46 119.5(4) . . ?
C1 N5 C51 120.6(4) . . ?
C1 N5 C53 116.8(4) . . ?
C51 N5 C53 118.0(4) . . ?
N1 C1 N5 126.7(4) . . ?
N1 C1 N3 108.9(4) . . ?
N5 C1 N3 124.4(4) . . ?
N2 C2 N1 115.6(4) . . ?
N2 C2 C21 121.4(4) . . ?
N1 C2 C21 122.9(4) . . ?
N4 C3 N3 116.7(4) . . ?
N4 C3 S2 121.3(3) . . ?
N3 C3 S2 121.9(3) . . ?
C22 C21 C26 119.6(5) . . ?
C22 C21 C2 120.7(4) . . ?
C26 C21 C2 119.6(5) . . ?
C21 C22 C23 120.0(5) . . ?
C21 C22 H22 120.0 . . ?
C23 C22 H22 120.0 . . ?
C24 C23 C22 119.8(6) . . ?
C24 C23 H23 120.1 . . ?
C22 C23 H23 120.1 . . ?
C25 C24 C23 120.0(5) . . ?
C25 C24 H24 120.0 . . ?
C23 C24 H24 120.0 . . ?
C24 C25 C26 121.4(5) . . ?
C24 C25 H25 119.3 . . ?
C26 C25 H25 119.3 . . ?
C25 C26 C21 119.1(6) . . ?
C25 C26 H26 120.5 . . ?
C21 C26 H26 120.5 . . ?
N4 C41 C42 113.7(4) . . ?
N4 C41 H41A 108.8 . . ?
C42 C41 H41A 108.8 . . ?
N4 C41 H41B 108.8 . . ?
C42 C41 H41B 108.8 . . ?
H41A C41 H41B 107.7 . . ?
C43 C42 C41 114.1(4) . . ?
C43 C42 H42A 108.7 . . ?
C41 C42 H42A 108.7 . . ?
C43 C42 H42B 108.7 . . ?
C41 C42 H42B 108.7 . . ?
H42A C42 H42B 107.6 . . ?
C42 C43 C44 115.0(4) . . ?
C42 C43 H43A 108.5 . . ?
C44 C43 H43A 108.5 . . ?
C42 C43 H43B 108.5 . . ?
C44 C43 H43B 108.5 . . ?
H43A C43 H43B 107.5 . . ?
C45 C44 C43 113.0(4) . . ?
C45 C44 H44A 109.0 . . ?
C43 C44 H44A 109.0 . . ?
C45 C44 H44B 109.0 . . ?
C43 C44 H44B 109.0 . . ?
H44A C44 H44B 107.8 . . ?
C44 C45 C46 115.1(4) . . ?
C44 C45 H45A 108.5 . . ?
C46 C45 H45A 108.5 . . ?
C44 C45 H45B 108.5 . . ?
C46 C45 H45B 108.5 . . ?
H45A C45 H45B 107.5 . . ?
N4 C46 C45 114.8(4) . . ?
N4 C46 H46A 108.6 . . ?
C45 C46 H46A 108.6 . . ?
N4 C46 H46B 108.6 . . ?
C45 C46 H46B 108.6 . . ?
H46A C46 H46B 107.6 . . ?
N5 C51 C52 113.1(5) . . ?
N5 C51 H51A 109.0 . . ?
C52 C51 H51A 109.0 . . ?
N5 C51 H51B 109.0 . . ?
C52 C51 H51B 109.0 . . ?
H51A C51 H51B 107.8 . . ?
C51 C52 H52A 109.5 . . ?
C51 C52 H52B 109.5 . . ?
H52A C52 H52B 109.5 . . ?
C51 C52 H52C 109.5 . . ?
H52A C52 H52C 109.5 . . ?
H52B C52 H52C 109.5 . . ?
N5 C53 C54 113.9(4) . . ?
N5 C53 H53A 108.8 . . ?
C54 C53 H53A 108.8 . . ?
N5 C53 H53B 108.8 . . ?
C54 C53 H53B 108.8 . . ?
H53A C53 H53B 107.7 . . ?
C53 C54 H54A 109.5 . . ?
C53 C54 H54B 109.5 . . ?
H54A C54 H54B 109.5 . . ?
C53 C54 H54C 109.5 . . ?
H54A C54 H54C 109.5 . . ?
H54B C54 H54C 109.5 . . ?

_diffrn_measured_fraction_theta_max 0.990
_diffrn_reflns_theta_full        29.22
_diffrn_measured_fraction_theta_full 0.990
_refine_diff_density_max         1.130
_refine_diff_density_min         -1.287
_refine_diff_density_rms         0.367

data_aul4cl
 
_audit_creation_method            SHELXL-97
_chemical_name_systematic
;
'Chloro(N-(N'',N''-diethylaminothiocarbonyl)-N'(N''', N'''-hexamethylene
carbothioamide)benzamidinato)gold(III)'
;
_chemical_name_common             [AuCl(AZPTSC)]
_chemical_melting_point           ?
_chemical_formula_moiety          'C19 H27 Au Cl N5 S2'
_chemical_formula_sum
 'C19 H27 Au Cl N5 S2'
_chemical_formula_weight          621.99
 
loop_
 _atom_type_symbol
 _atom_type_description
 _atom_type_scat_dispersion_real
 _atom_type_scat_dispersion_imag
 _atom_type_scat_source
 'C'  'C'   0.0033   0.0016
 'International Tables Vol C Tables 4.2.6.8 and 6.1.1.4'
 'H'  'H'   0.0000   0.0000
 'International Tables Vol C Tables 4.2.6.8 and 6.1.1.4'
 'Au'  'Au'  -2.0133   8.8022
 'International Tables Vol C Tables 4.2.6.8 and 6.1.1.4'
 'Cl'  'Cl'   0.1484   0.1585
 'International Tables Vol C Tables 4.2.6.8 and 6.1.1.4'
 'N'  'N'   0.0061   0.0033
 'International Tables Vol C Tables 4.2.6.8 and 6.1.1.4'
 'S'  'S'   0.1246   0.1234
 'International Tables Vol C Tables 4.2.6.8 and 6.1.1.4'
 
_symmetry_cell_setting            orthorhombic
_symmetry_space_group_name_H-M    'P b c a'
 
loop_
 _symmetry_equiv_pos_as_xyz
 'x, y, z'
 '-x+1/2, -y, z+1/2'
 'x+1/2, -y+1/2, -z'
 '-x, y+1/2, -z+1/2'
 '-x, -y, -z'
 'x-1/2, y, -z-1/2'
 '-x-1/2, y-1/2, z'
 'x, -y-1/2, z-1/2'
 
_cell_length_a                    13.7878(6)
_cell_length_b                    9.7254(5)
_cell_length_c                    33.280(1)
_cell_angle_alpha                 90.00
_cell_angle_beta                  90.00
_cell_angle_gamma                 90.00
_cell_volume                      4462.6(4)
_cell_formula_units_Z             8
_cell_measurement_temperature     200(2)
_cell_measurement_reflns_used     21455
_cell_measurement_theta_min       2.45
_cell_measurement_theta_max       29.66
 
_exptl_crystal_description        'needle'
_exptl_crystal_colour             'green'
_exptl_crystal_size_max           0.300
_exptl_crystal_size_mid           0.133
_exptl_crystal_size_min           0.050
_exptl_crystal_density_meas       ?
_exptl_crystal_density_diffrn     1.852
_exptl_crystal_density_method     'not measured'
_exptl_crystal_F_000              2432
_exptl_absorpt_coefficient_mu     6.915
_exptl_absorpt_correction_type    integration
_exptl_absorpt_correction_T_min   0.3142
_exptl_absorpt_correction_T_max   0.5417
_exptl_absorpt_process_details    'STOE X-RED'
 
_exptl_special_details
;
 ?
;
 
_diffrn_ambient_temperature       200(2)
_diffrn_radiation_wavelength      0.71073
_diffrn_radiation_type            MoK\a
_diffrn_radiation_source          'fine-focus sealed tube'
_diffrn_radiation_monochromator   graphite
_diffrn_measurement_device_type   'STOE IPDS 2T'
_diffrn_measurement_method        'rotation method'
_diffrn_detector_area_resol_mean  6.67
_diffrn_standards_number          ?
_diffrn_standards_interval_count  ?
_diffrn_standards_interval_time   ?
_diffrn_standards_decay_%         ?
_diffrn_reflns_number             45569
_diffrn_reflns_av_R_equivalents   0.0957
_diffrn_reflns_av_sigmaI/netI     0.0623
_diffrn_reflns_limit_h_min        -18
_diffrn_reflns_limit_h_max        18
_diffrn_reflns_limit_k_min        -11
_diffrn_reflns_limit_k_max        13
_diffrn_reflns_limit_l_min        -45
_diffrn_reflns_limit_l_max        45
_diffrn_reflns_theta_min          1.92
_diffrn_reflns_theta_max          29.27
_reflns_number_total              6026
_reflns_number_gt                 3765
_reflns_threshold_expression      >2sigma(I)
 
_computing_data_collection        'STOE X-AREA'
_computing_cell_refinement        'STOE X-AREA'
_computing_data_reduction         'STOE X-RED'
_computing_structure_solution     'SHELXS-97 (Sheldrick, 1997)'
_computing_structure_refinement   'SHELXL-97 (Sheldrick, 1997)'
_computing_molecular_graphics     'Ortep-3 for Windows (Farrugia, 1997)'
_computing_publication_material   'WinGX publication routines (Farrugia, 1999)'
 
_refine_special_details
;
 Refinement of F^2^ against ALL reflections.  The weighted R-factor wR and
 goodness of fit S are based on F^2^, conventional R-factors R are based
 on F, with F set to zero for negative F^2^. The threshold expression of
 F^2^ > 2sigma(F^2^) is used only for calculating R-factors(gt) etc. and is
 not relevant to the choice of reflections for refinement.  R-factors based
 on F^2^ are statistically about twice as large as those based on F, and R-
 factors based on ALL data will be even larger.
;
 
_refine_ls_structure_factor_coef  Fsqd
_refine_ls_matrix_type            full
_refine_ls_weighting_scheme       calc
_refine_ls_weighting_details
 'calc w=1/[\s^2^(Fo^2^)+(0.0890P)^2^+0.0000P] where P=(Fo^2^+2Fc^2^)/3'
_atom_sites_solution_primary      direct
_atom_sites_solution_secondary    difmap
_atom_sites_solution_hydrogens    geom
_refine_ls_hydrogen_treatment     constr
_refine_ls_extinction_method      SHELXL
_refine_ls_extinction_coef        0.00367(17)
_refine_ls_extinction_expression
 'Fc^*^=kFc[1+0.001xFc^2^\l^3^/sin(2\q)]^-1/4^'
_refine_ls_number_reflns          6026
_refine_ls_number_parameters      256
_refine_ls_number_restraints      0
_refine_ls_R_factor_all           0.0842
_refine_ls_R_factor_gt            0.0500
_refine_ls_wR_factor_ref          0.1351
_refine_ls_wR_factor_gt           0.1199
_refine_ls_goodness_of_fit_ref    0.883
_refine_ls_restrained_S_all       0.883
_refine_ls_shift/su_max           0.001
_refine_ls_shift/su_mean          0.000
 
loop_
 _atom_site_label
 _atom_site_type_symbol
 _atom_site_fract_x
 _atom_site_fract_y
 _atom_site_fract_z
 _atom_site_U_iso_or_equiv
 _atom_site_adp_type
 _atom_site_occupancy
 _atom_site_symmetry_multiplicity
 _atom_site_calc_flag
 _atom_site_refinement_flags
 _atom_site_disorder_assembly
 _atom_site_disorder_group
Au Au -0.826225(18) 0.43295(3) 0.129111(8) 0.03382(12) Uani 1 1 d . . .
Cl Cl -0.99324(13) 0.4363(2) 0.13381(6) 0.0466(5) Uani 1 1 d . . .
S1 S -0.82798(13) 0.5948(2) 0.17876(6) 0.0426(4) Uani 1 1 d . . .
S2 S -0.83352(14) 0.2711(2) 0.07934(6) 0.0415(4) Uani 1 1 d . . .
N1 N -0.6283(4) 0.5736(7) 0.17503(17) 0.0370(13) Uani 1 1 d . . .
N2 N -0.6808(4) 0.4203(6) 0.12314(16) 0.0336(13) Uani 1 1 d . . .
N3 N -0.6452(4) 0.3376(7) 0.09230(17) 0.0381(14) Uani 1 1 d . . .
N4 N -0.6717(5) 0.1677(7) 0.0466(2) 0.0447(15) Uani 1 1 d . . .
N5 N -0.6935(4) 0.7210(7) 0.21978(19) 0.0425(15) Uani 1 1 d . . .
C1 C -0.7076(5) 0.6283(8) 0.1902(2) 0.0382(16) Uani 1 1 d . . .
C2 C -0.6163(5) 0.4804(8) 0.1453(2) 0.0317(14) Uani 1 1 d . . .
C3 C -0.7063(5) 0.2631(8) 0.0729(2) 0.0381(16) Uani 1 1 d . . .
C21 C -0.5102(5) 0.4520(8) 0.13849(19) 0.0333(15) Uani 1 1 d . . .
C22 C -0.4744(6) 0.3186(9) 0.1384(2) 0.0450(18) Uani 1 1 d . . .
H22 H -0.5166 0.2443 0.1402 0.054 Uiso 1 1 calc R . .
C23 C -0.3754(6) 0.2966(10) 0.1355(2) 0.049(2) Uani 1 1 d . . .
H23 H -0.3514 0.2072 0.1364 0.059 Uiso 1 1 calc R . .
C24 C -0.3120(5) 0.4052(10) 0.1313(2) 0.047(2) Uani 1 1 d . . .
H24 H -0.2456 0.3899 0.1290 0.056 Uiso 1 1 calc R . .
C25 C -0.3483(6) 0.5352(10) 0.1307(3) 0.053(2) Uani 1 1 d . . .
H25 H -0.3061 0.6091 0.1275 0.063 Uiso 1 1 calc R . .
C26 C -0.4467(6) 0.5600(9) 0.1346(3) 0.0459(19) Uani 1 1 d . . .
H26 H -0.4699 0.6498 0.1345 0.055 Uiso 1 1 calc R . .
C41 C -0.7333(7) 0.0982(9) 0.0173(3) 0.052(2) Uani 1 1 d . . .
H41A H -0.7994 0.0973 0.0272 0.062 Uiso 1 1 calc R . .
H41B H -0.7121 0.0036 0.0147 0.062 Uiso 1 1 calc R . .
C42 C -0.7316(8) 0.1656(14) -0.0237(3) 0.075(3) Uani 1 1 d . . .
H42A H -0.7641 0.1041 -0.0423 0.090 Uiso 1 1 calc R . .
H42B H -0.7707 0.2484 -0.0220 0.090 Uiso 1 1 calc R . .
C43 C -0.6403(9) 0.2031(16) -0.0415(3) 0.087(4) Uani 1 1 d . . .
H43A H -0.6540 0.2379 -0.0683 0.105 Uiso 1 1 calc R . .
H43B H -0.6032 0.1192 -0.0449 0.105 Uiso 1 1 calc R . .
C44 C -0.5767(8) 0.3036(14) -0.0217(4) 0.086(4) Uani 1 1 d . . .
H44A H -0.6165 0.3815 -0.0141 0.103 Uiso 1 1 calc R . .
H44B H -0.5309 0.3363 -0.0417 0.103 Uiso 1 1 calc R . .
C45 C -0.5184(7) 0.2612(11) 0.0153(3) 0.067(3) Uani 1 1 d . . .
H45A H -0.5065 0.3420 0.0316 0.080 Uiso 1 1 calc R . .
H45B H -0.4560 0.2260 0.0066 0.080 Uiso 1 1 calc R . .
C46 C -0.5681(6) 0.1520(10) 0.0413(3) 0.056(2) Uani 1 1 d . . .
H46A H -0.5560 0.0625 0.0294 0.067 Uiso 1 1 calc R . .
H46B H -0.5378 0.1525 0.0676 0.067 Uiso 1 1 calc R . .
C51 C -0.5937(6) 0.7449(10) 0.2355(3) 0.056(2) Uani 1 1 d . . .
H51A H -0.5932 0.8289 0.2512 0.067 Uiso 1 1 calc R . .
H51B H -0.5497 0.7574 0.2130 0.067 Uiso 1 1 calc R . .
C52 C -0.5577(7) 0.6282(14) 0.2612(3) 0.073(3) Uani 1 1 d . . .
H52A H -0.5505 0.5472 0.2450 0.109 Uiso 1 1 calc R . .
H52B H -0.6035 0.6107 0.2824 0.109 Uiso 1 1 calc R . .
H52C H -0.4961 0.6524 0.2727 0.109 Uiso 1 1 calc R . .
C53 C -0.7732(6) 0.7958(9) 0.2395(2) 0.0466(19) Uani 1 1 d . . .
H53A H -0.8265 0.8051 0.2207 0.056 Uiso 1 1 calc R . .
H53B H -0.7510 0.8876 0.2463 0.056 Uiso 1 1 calc R . .
C54 C -0.8101(6) 0.7263(13) 0.2772(3) 0.062(3) Uani 1 1 d . . .
H54A H -0.7576 0.7152 0.2959 0.094 Uiso 1 1 calc R . .
H54B H -0.8362 0.6377 0.2705 0.094 Uiso 1 1 calc R . .
H54C H -0.8599 0.7818 0.2892 0.094 Uiso 1 1 calc R . .
 
loop_
 _atom_site_aniso_label
 _atom_site_aniso_U_11
 _atom_site_aniso_U_22
 _atom_site_aniso_U_33
 _atom_site_aniso_U_23
 _atom_site_aniso_U_13
 _atom_site_aniso_U_12
Au 0.02970(15) 0.03463(17) 0.03711(16) -0.00008(12) -0.00245(10) 0.00095(11)
Cl 0.0304(8) 0.0462(11) 0.0631(12) -0.0049(10) -0.0026(7) -0.0014(8)
S1 0.0314(8) 0.0481(12) 0.0483(10) -0.0105(8) -0.0026(7) 0.0048(8)
S2 0.0374(9) 0.0427(11) 0.0443(9) -0.0070(8) -0.0026(7) -0.0033(8)
N1 0.032(3) 0.045(4) 0.034(3) -0.006(3) -0.002(2) 0.003(3)
N2 0.019(2) 0.049(4) 0.033(3) -0.002(2) 0.0010(19) 0.000(2)
N3 0.033(3) 0.048(4) 0.034(3) -0.007(3) 0.005(2) 0.000(3)
N4 0.045(4) 0.044(4) 0.045(3) -0.015(3) 0.001(3) 0.002(3)
N5 0.036(3) 0.046(4) 0.045(3) -0.012(3) 0.000(2) 0.000(3)
C1 0.036(4) 0.042(4) 0.037(4) 0.001(3) 0.003(3) 0.005(3)
C2 0.024(3) 0.035(4) 0.036(3) 0.007(3) 0.000(3) 0.000(3)
C3 0.045(4) 0.035(4) 0.034(3) 0.002(3) 0.001(3) 0.006(3)
C21 0.030(3) 0.040(4) 0.030(3) -0.005(3) -0.006(2) 0.002(3)
C22 0.034(4) 0.048(5) 0.053(4) 0.000(4) 0.003(3) -0.005(3)
C23 0.038(4) 0.050(5) 0.059(5) 0.003(4) 0.000(3) 0.013(4)
C24 0.023(3) 0.067(6) 0.050(4) -0.004(4) 0.002(3) 0.009(3)
C25 0.031(4) 0.058(6) 0.068(6) -0.002(4) 0.007(4) -0.009(4)
C26 0.036(4) 0.038(4) 0.064(5) -0.004(4) 0.007(3) 0.003(3)
C41 0.062(5) 0.041(5) 0.052(5) -0.017(4) -0.002(4) -0.005(4)
C42 0.077(7) 0.106(10) 0.042(5) -0.008(5) -0.004(5) -0.001(6)
C43 0.100(8) 0.122(11) 0.040(5) 0.000(6) 0.001(5) -0.031(8)
C44 0.061(6) 0.085(9) 0.112(9) 0.027(8) 0.014(6) 0.001(6)
C45 0.059(6) 0.075(7) 0.066(6) -0.012(5) 0.022(5) -0.002(5)
C46 0.049(5) 0.056(6) 0.063(5) -0.020(4) -0.001(4) 0.004(4)
C51 0.039(4) 0.067(7) 0.061(5) -0.028(5) -0.001(4) -0.002(4)
C52 0.051(5) 0.117(10) 0.050(5) -0.007(6) -0.015(4) 0.015(6)
C53 0.049(4) 0.041(5) 0.051(4) -0.016(4) 0.006(3) 0.001(4)
C54 0.044(5) 0.094(8) 0.050(5) -0.003(5) 0.000(4) 0.003(5)
 
_geom_special_details
;
 All esds (except the esd in the dihedral angle between two l.s. planes)
 are estimated using the full covariance matrix.  The cell esds are taken
 into account individually in the estimation of esds in distances, angles
 and torsion angles; correlations between esds in cell parameters are only
 used when they are defined by crystal symmetry.  An approximate (isotropic)
 treatment of cell esds is used for estimating esds involving l.s. planes.
;
 
loop_
 _geom_bond_atom_site_label_1
 _geom_bond_atom_site_label_2
 _geom_bond_distance
 _geom_bond_site_symmetry_2
 _geom_bond_publ_flag
Au N2 2.018(5) . ?
Au S1 2.282(2) . ?
Au S2 2.2870(19) . ?
Au Cl 2.3083(19) . ?
S1 C1 1.734(8) . ?
S2 C3 1.768(8) . ?
N1 C1 1.317(9) . ?
N1 C2 1.352(9) . ?
N2 C2 1.295(9) . ?
N2 N3 1.394(8) . ?
N3 C3 1.285(10) . ?
N4 C3 1.363(9) . ?
N4 C46 1.447(10) . ?
N4 C41 1.460(10) . ?
N5 C1 1.348(10) . ?
N5 C53 1.472(9) . ?
N5 C51 1.491(9) . ?
C2 C21 1.506(9) . ?
C21 C26 1.373(11) . ?
C21 C22 1.388(11) . ?
C22 C23 1.384(11) . ?
C22 H22 0.9300 . ?
C23 C24 1.379(13) . ?
C23 H23 0.9300 . ?
C24 C25 1.360(13) . ?
C24 H24 0.9300 . ?
C25 C26 1.385(11) . ?
C25 H25 0.9300 . ?
C26 H26 0.9300 . ?
C41 C42 1.514(13) . ?
C41 H41A 0.9700 . ?
C41 H41B 0.9700 . ?
C42 C43 1.439(15) . ?
C42 H42A 0.9700 . ?
C42 H42B 0.9700 . ?
C43 C44 1.469(17) . ?
C43 H43A 0.9700 . ?
C43 H43B 0.9700 . ?
C44 C45 1.527(15) . ?
C44 H44A 0.9700 . ?
C44 H44B 0.9700 . ?
C45 C46 1.532(13) . ?
C45 H45A 0.9700 . ?
C45 H45B 0.9700 . ?
C46 H46A 0.9700 . ?
C46 H46B 0.9700 . ?
C51 C52 1.506(15) . ?
C51 H51A 0.9700 . ?
C51 H51B 0.9700 . ?
C52 H52A 0.9600 . ?
C52 H52B 0.9600 . ?
C52 H52C 0.9600 . ?
C53 C54 1.515(12) . ?
C53 H53A 0.9700 . ?
C53 H53B 0.9700 . ?
C54 H54A 0.9600 . ?
C54 H54B 0.9600 . ?
C54 H54C 0.9600 . ?
 
loop_
 _geom_angle_atom_site_label_1
 _geom_angle_atom_site_label_2
 _geom_angle_atom_site_label_3
 _geom_angle
 _geom_angle_site_symmetry_1
 _geom_angle_site_symmetry_3
 _geom_angle_publ_flag
N2 Au S1 97.11(17) . . ?
N2 Au S2 86.02(17) . . ?
S1 Au S2 176.87(7) . . ?
N2 Au Cl 176.79(18) . . ?
S1 Au Cl 86.03(7) . . ?
S2 Au Cl 90.85(7) . . ?
C1 S1 Au 106.2(3) . . ?
C3 S2 Au 94.2(3) . . ?
C1 N1 C2 130.8(6) . . ?
C2 N2 N3 115.9(5) . . ?
C2 N2 Au 126.8(5) . . ?
N3 N2 Au 117.3(4) . . ?
C3 N3 N2 117.6(6) . . ?
C3 N4 C46 119.8(7) . . ?
C3 N4 C41 122.7(7) . . ?
C46 N4 C41 116.3(7) . . ?
C1 N5 C53 123.2(6) . . ?
C1 N5 C51 119.5(6) . . ?
C53 N5 C51 117.1(6) . . ?
N1 C1 N5 115.5(7) . . ?
N1 C1 S1 129.4(6) . . ?
N5 C1 S1 115.1(5) . . ?
N2 C2 N1 129.5(6) . . ?
N2 C2 C21 119.9(6) . . ?
N1 C2 C21 110.6(6) . . ?
N3 C3 N4 118.4(7) . . ?
N3 C3 S2 124.4(6) . . ?
N4 C3 S2 117.1(6) . . ?
C26 C21 C22 119.2(7) . . ?
C26 C21 C2 119.5(7) . . ?
C22 C21 C2 121.2(7) . . ?
C23 C22 C21 119.7(8) . . ?
C23 C22 H22 120.1 . . ?
C21 C22 H22 120.1 . . ?
C24 C23 C22 120.9(8) . . ?
C24 C23 H23 119.6 . . ?
C22 C23 H23 119.6 . . ?
C25 C24 C23 118.8(7) . . ?
C25 C24 H24 120.6 . . ?
C23 C24 H24 120.6 . . ?
C24 C25 C26 121.4(8) . . ?
C24 C25 H25 119.3 . . ?
C26 C25 H25 119.3 . . ?
C21 C26 C25 120.1(8) . . ?
C21 C26 H26 120.0 . . ?
C25 C26 H26 120.0 . . ?
N4 C41 C42 113.1(8) . . ?
N4 C41 H41A 108.9 . . ?
C42 C41 H41A 108.9 . . ?
N4 C41 H41B 108.9 . . ?
C42 C41 H41B 108.9 . . ?
H41A C41 H41B 107.8 . . ?
C43 C42 C41 119.7(10) . . ?
C43 C42 H42A 107.4 . . ?
C41 C42 H42A 107.4 . . ?
C43 C42 H42B 107.4 . . ?
C41 C42 H42B 107.4 . . ?
H42A C42 H42B 106.9 . . ?
C42 C43 C44 120.4(10) . . ?
C42 C43 H43A 107.2 . . ?
C44 C43 H43A 107.2 . . ?
C42 C43 H43B 107.2 . . ?
C44 C43 H43B 107.2 . . ?
H43A C43 H43B 106.9 . . ?
C43 C44 C45 119.8(11) . . ?
C43 C44 H44A 107.4 . . ?
C45 C44 H44A 107.4 . . ?
C43 C44 H44B 107.4 . . ?
C45 C44 H44B 107.4 . . ?
H44A C44 H44B 106.9 . . ?
C44 C45 C46 114.0(9) . . ?
C44 C45 H45A 108.7 . . ?
C46 C45 H45A 108.7 . . ?
C44 C45 H45B 108.7 . . ?
C46 C45 H45B 108.7 . . ?
H45A C45 H45B 107.6 . . ?
N4 C46 C45 115.9(8) . . ?
N4 C46 H46A 108.3 . . ?
C45 C46 H46A 108.3 . . ?
N4 C46 H46B 108.3 . . ?
C45 C46 H46B 108.3 . . ?
H46A C46 H46B 107.4 . . ?
N5 C51 C52 112.7(8) . . ?
N5 C51 H51A 109.0 . . ?
C52 C51 H51A 109.0 . . ?
N5 C51 H51B 109.0 . . ?
C52 C51 H51B 109.0 . . ?
H51A C51 H51B 107.8 . . ?
C51 C52 H52A 109.5 . . ?
C51 C52 H52B 109.5 . . ?
H52A C52 H52B 109.5 . . ?
C51 C52 H52C 109.5 . . ?
H52A C52 H52C 109.5 . . ?
H52B C52 H52C 109.5 . . ?
N5 C53 C54 113.5(7) . . ?
N5 C53 H53A 108.9 . . ?
C54 C53 H53A 108.9 . . ?
N5 C53 H53B 108.9 . . ?
C54 C53 H53B 108.9 . . ?
H53A C53 H53B 107.7 . . ?
C53 C54 H54A 109.5 . . ?
C53 C54 H54B 109.5 . . ?
H54A C54 H54B 109.5 . . ?
C53 C54 H54C 109.5 . . ?
H54A C54 H54C 109.5 . . ?
H54B C54 H54C 109.5 . . ?
 
_diffrn_measured_fraction_theta_max    0.989
_diffrn_reflns_theta_full              29.27
_diffrn_measured_fraction_theta_full   0.989
_refine_diff_density_max    2.210
_refine_diff_density_min   -1.983
_refine_diff_density_rms    0.455

data_aul5cl
 
_audit_creation_method            SHELXL-97
_chemical_name_systematic
;
'Chloro(N-(N'',N''-diethylaminothiocarbonyl)-N'(N''', N'''-
dimethylcarbothioamide)benzamidineto)gold(III)' 
;
_chemical_name_common             [AuCl(DMTSC)]
_chemical_melting_point           ?
_chemical_formula_moiety          'C15 H21 Au Cl N5 S2'
_chemical_formula_sum
 'C15 H21 Au Cl N5 S2'
_chemical_formula_weight          567.90

 
loop_
 _atom_type_symbol
 _atom_type_description
 _atom_type_scat_dispersion_real
 _atom_type_scat_dispersion_imag
 _atom_type_scat_source
 'C'  'C'   0.0033   0.0016
 'International Tables Vol C Tables 4.2.6.8 and 6.1.1.4'
 'H'  'H'   0.0000   0.0000
 'International Tables Vol C Tables 4.2.6.8 and 6.1.1.4'
 'Au'  'Au'  -2.0133   8.8022
 'International Tables Vol C Tables 4.2.6.8 and 6.1.1.4'
 'Cl'  'Cl'   0.1484   0.1585
 'International Tables Vol C Tables 4.2.6.8 and 6.1.1.4'
 'N'  'N'   0.0061   0.0033
 'International Tables Vol C Tables 4.2.6.8 and 6.1.1.4'
 'S'  'S'   0.1246   0.1234
 'International Tables Vol C Tables 4.2.6.8 and 6.1.1.4'
 
_symmetry_cell_setting            monoclinic
_symmetry_space_group_name_H-M    'P 21/n'

 
loop_
 _symmetry_equiv_pos_as_xyz
 'x, y, z'
 '-x+1/2, y+1/2, -z+1/2'
 '-x, -y, -z'
 'x-1/2, -y-1/2, z-1/2'
 
_cell_length_a                    10.8864(7)
_cell_length_b                    8.0631(6)
_cell_length_c                    22.032(1)
_cell_angle_alpha                 90.00
_cell_angle_beta                  99.56(1)
_cell_angle_gamma                 90.00
_cell_volume                      1907.0(2)
_cell_formula_units_Z             4
_cell_measurement_temperature     200(2)
_cell_measurement_reflns_used     9797
_cell_measurement_theta_min       2.25
_cell_measurement_theta_max       29.62
 
_exptl_crystal_description        needles
_exptl_crystal_colour             green
_exptl_crystal_size_max           0.15
_exptl_crystal_size_mid           0.1
_exptl_crystal_size_min           0.07
_exptl_crystal_density_meas       ?
_exptl_crystal_density_diffrn     1.978
_exptl_crystal_density_method     'not measured'
_exptl_crystal_F_000              1096
_exptl_absorpt_coefficient_mu     8.081
_exptl_absorpt_correction_type    integration
_exptl_absorpt_correction_T_min   0.3744
_exptl_absorpt_correction_T_max   0.7692
_exptl_absorpt_process_details    ?

_exptl_special_details
;
'X-RED' 
;
 
_diffrn_ambient_temperature       200(2)
_diffrn_radiation_wavelength      0.71073
_diffrn_radiation_type            MoK\a
_diffrn_radiation_source          'fine-focus sealed tube'
_diffrn_radiation_monochromator   graphite
_diffrn_measurement_device_type   'STOE IPDS 2T'
_diffrn_measurement_method        'rotation method'
_diffrn_detector_area_resol_mean  6.67
_diffrn_standards_number          ?
_diffrn_standards_interval_count  ?
_diffrn_standards_interval_time   ?
_diffrn_standards_decay_%         ?
_diffrn_reflns_number             13168
_diffrn_reflns_av_R_equivalents   0.0590
_diffrn_reflns_av_sigmaI/netI     0.0625
_diffrn_reflns_limit_h_min        -14
_diffrn_reflns_limit_h_max        14
_diffrn_reflns_limit_k_min        -11
_diffrn_reflns_limit_k_max        10
_diffrn_reflns_limit_l_min        -29
_diffrn_reflns_limit_l_max        30
_diffrn_reflns_theta_min          1.87
_diffrn_reflns_theta_max          29.21
_reflns_number_total              5115
_reflns_number_gt                 3622
_reflns_threshold_expression      >2sigma(I)
 
_computing_data_collection        'STOE X-AREA'
_computing_cell_refinement        'STOE X-AREA'
_computing_data_reduction         'STOE X-RED'
_computing_structure_solution     'SHELXS-97 (Sheldrick, 1997)'
_computing_structure_refinement   'SHELXL-97 (Sheldrick, 1997)'
_computing_molecular_graphics     'Ortep-3 for Windows (Farrugia, 1997)'
_computing_publication_material   'WinGX publication routines (Farrugia, 1999)'
 
_refine_special_details
;
 Refinement of F^2^ against ALL reflections.  The weighted R-factor wR and
 goodness of fit S are based on F^2^, conventional R-factors R are based
 on F, with F set to zero for negative F^2^. The threshold expression of
 F^2^ > 2sigma(F^2^) is used only for calculating R-factors(gt) etc. and is
 not relevant to the choice of reflections for refinement.  R-factors based
 on F^2^ are statistically about twice as large as those based on F, and R-
 factors based on ALL data will be even larger.
;
 
_refine_ls_structure_factor_coef  Fsqd
_refine_ls_matrix_type            full
_refine_ls_weighting_scheme       calc
_refine_ls_weighting_details
 'calc w=1/[\s^2^(Fo^2^)+(0.0705P)^2^+0.0000P] where P=(Fo^2^+2Fc^2^)/3'
_atom_sites_solution_primary      direct
_atom_sites_solution_secondary    difmap
_atom_sites_solution_hydrogens    geom
_refine_ls_hydrogen_treatment     constr
_refine_ls_extinction_method      SHELXL
_refine_ls_extinction_coef        0.0103(5)
_refine_ls_extinction_expression
 'Fc^*^=kFc[1+0.001xFc^2^\l^3^/sin(2\q)]^-1/4^'
_refine_ls_number_reflns          5115
_refine_ls_number_parameters      222
_refine_ls_number_restraints      0
_refine_ls_R_factor_all           0.0734
_refine_ls_R_factor_gt            0.0465
_refine_ls_wR_factor_ref          0.1247
_refine_ls_wR_factor_gt           0.1046
_refine_ls_goodness_of_fit_ref    1.002
_refine_ls_restrained_S_all       1.002
_refine_ls_shift/su_max           0.005
_refine_ls_shift/su_mean          0.000
 
loop_
 _atom_site_label
 _atom_site_type_symbol
 _atom_site_fract_x
 _atom_site_fract_y
 _atom_site_fract_z
 _atom_site_U_iso_or_equiv
 _atom_site_adp_type
 _atom_site_occupancy
 _atom_site_symmetry_multiplicity
 _atom_site_calc_flag
 _atom_site_refinement_flags
 _atom_site_disorder_assembly
 _atom_site_disorder_group
Au Au 0.37966(3) 0.23202(3) 0.025578(13) 0.03497(13) Uani 1 1 d . . .
Cl Cl 0.2735(2) 0.2749(3) 0.10571(10) 0.0535(5) Uani 1 1 d . . .
S1 S 0.1935(2) 0.1380(3) -0.02691(10) 0.0472(5) Uani 1 1 d . . .
S2 S 0.5589(2) 0.3299(3) 0.08333(9) 0.0465(5) Uani 1 1 d . . .
N1 N 0.3270(6) 0.1025(8) -0.1216(3) 0.0382(14) Uani 1 1 d . . .
N2 N 0.4840(6) 0.2063(8) -0.0413(3) 0.0335(13) Uani 1 1 d . . .
N3 N 0.6097(6) 0.2437(8) -0.0288(3) 0.0401(14) Uani 1 1 d . . .
N4 N 0.7739(7) 0.3437(12) 0.0405(3) 0.055(2) Uani 1 1 d . . .
N5 N 0.1324(7) 0.0020(9) -0.1358(3) 0.0443(16) Uani 1 1 d . . .
C1 C 0.2247(7) 0.0786(10) -0.0984(4) 0.0371(16) Uani 1 1 d . . .
C2 C 0.4397(7) 0.1613(9) -0.0982(3) 0.0347(15) Uani 1 1 d . . .
C3 C 0.6499(7) 0.3015(10) 0.0259(3) 0.0380(16) Uani 1 1 d . . .
C21 C 0.5209(7) 0.1754(9) -0.1475(3) 0.0318(14) Uani 1 1 d . . .
C22 C 0.5168(8) 0.0490(11) -0.1892(4) 0.0433(18) Uani 1 1 d . . .
H22 H 0.4714 -0.0464 -0.1843 0.052 Uiso 1 1 calc R . .
C23 C 0.5797(9) 0.0620(13) -0.2387(4) 0.051(2) Uani 1 1 d . . .
H23 H 0.5768 -0.0244 -0.2669 0.061 Uiso 1 1 calc R . .
C24 C 0.6469(8) 0.2038(13) -0.2462(4) 0.049(2) Uani 1 1 d . . .
H24 H 0.6905 0.2125 -0.2790 0.059 Uiso 1 1 calc R . .
C25 C 0.6491(8) 0.3305(11) -0.2053(4) 0.0443(18) Uani 1 1 d . . .
H25 H 0.6922 0.4273 -0.2111 0.053 Uiso 1 1 calc R . .
C26 C 0.5882(7) 0.3176(11) -0.1553(4) 0.0389(16) Uani 1 1 d . . .
H26 H 0.5923 0.4039 -0.1271 0.047 Uiso 1 1 calc R . .
C41 C 0.8233(10) 0.4252(13) 0.0989(4) 0.057(2) Uani 1 1 d . . .
H41A H 0.7810 0.5287 0.1016 0.086 Uiso 1 1 calc R . .
H41B H 0.9108 0.4453 0.1010 0.086 Uiso 1 1 calc R . .
H41C H 0.8106 0.3550 0.1325 0.086 Uiso 1 1 calc R . .
C42 C 0.8506(8) 0.3333(16) -0.0073(4) 0.059(3) Uani 1 1 d . . .
H42A H 0.8138 0.2566 -0.0384 0.089 Uiso 1 1 calc R . .
H42B H 0.9325 0.2957 0.0103 0.089 Uiso 1 1 calc R . .
H42C H 0.8563 0.4408 -0.0254 0.089 Uiso 1 1 calc R . .
C51 C 0.0084(8) -0.0262(11) -0.1194(4) 0.047(2) Uani 1 1 d . . .
H51A H 0.0162 -0.0328 -0.0750 0.057 Uiso 1 1 calc R . .
H51B H -0.0238 -0.1316 -0.1364 0.057 Uiso 1 1 calc R . .
C52 C -0.0824(10) 0.1081(14) -0.1426(5) 0.062(3) Uani 1 1 d . . .
H52A H -0.0518 0.2126 -0.1254 0.093 Uiso 1 1 calc R . .
H52B H -0.1614 0.0845 -0.1307 0.093 Uiso 1 1 calc R . .
H52C H -0.0921 0.1134 -0.1867 0.093 Uiso 1 1 calc R . .
C53 C 0.1497(10) -0.0475(13) -0.1984(4) 0.053(2) Uani 1 1 d . . .
H53A H 0.0872 -0.1295 -0.2140 0.063 Uiso 1 1 calc R . .
H53B H 0.2308 -0.0992 -0.1961 0.063 Uiso 1 1 calc R . .
C54 C 0.1406(13) 0.0946(18) -0.2429(5) 0.081(4) Uani 1 1 d . . .
H54A H 0.0583 0.1409 -0.2480 0.122 Uiso 1 1 calc R . .
H54B H 0.1574 0.0556 -0.2819 0.122 Uiso 1 1 calc R . .
H54C H 0.2004 0.1781 -0.2272 0.122 Uiso 1 1 calc R . .
 
loop_
 _atom_site_aniso_label
 _atom_site_aniso_U_11
 _atom_site_aniso_U_22
 _atom_site_aniso_U_33
 _atom_site_aniso_U_23
 _atom_site_aniso_U_13
 _atom_site_aniso_U_12
Au 0.03961(18) 0.03518(18) 0.03302(16) 0.00155(12) 0.01453(10) 0.00091(12)
Cl 0.0579(13) 0.0649(14) 0.0441(10) -0.0066(9) 0.0273(9) -0.0077(10)
S1 0.0398(11) 0.0618(14) 0.0443(11) -0.0085(9) 0.0192(9) -0.0080(9)
S2 0.0457(11) 0.0588(12) 0.0360(10) -0.0045(9) 0.0098(8) -0.0009(9)
N1 0.036(3) 0.044(4) 0.036(3) -0.003(3) 0.010(3) -0.007(3)
N2 0.032(3) 0.040(3) 0.034(3) -0.001(2) 0.019(2) 0.002(2)
N3 0.030(3) 0.053(4) 0.038(3) 0.000(3) 0.008(3) -0.004(3)
N4 0.036(4) 0.085(6) 0.044(4) -0.008(4) 0.004(3) -0.009(4)
N5 0.037(4) 0.053(4) 0.044(4) 0.003(3) 0.007(3) -0.002(3)
C1 0.026(4) 0.042(4) 0.044(4) 0.003(3) 0.006(3) -0.005(3)
C2 0.038(4) 0.036(4) 0.031(3) 0.001(3) 0.009(3) 0.000(3)
C3 0.030(4) 0.051(4) 0.033(3) 0.002(3) 0.005(3) 0.003(3)
C21 0.030(3) 0.039(4) 0.028(3) 0.002(3) 0.008(3) 0.002(3)
C22 0.049(5) 0.043(4) 0.038(4) -0.007(3) 0.010(4) 0.002(4)
C23 0.054(5) 0.066(6) 0.036(4) -0.010(4) 0.015(4) 0.010(4)
C24 0.035(4) 0.081(6) 0.036(4) 0.011(4) 0.017(3) 0.015(4)
C25 0.039(4) 0.046(4) 0.049(4) 0.012(4) 0.012(3) 0.001(3)
C26 0.034(4) 0.046(4) 0.038(4) 0.006(3) 0.009(3) -0.003(3)
C41 0.050(6) 0.067(6) 0.049(5) -0.001(4) -0.006(4) -0.007(4)
C42 0.031(4) 0.097(8) 0.050(5) -0.005(5) 0.006(4) -0.010(5)
C51 0.042(5) 0.052(5) 0.050(5) 0.003(4) 0.012(4) -0.006(4)
C52 0.045(5) 0.073(7) 0.068(6) 0.002(5) 0.009(5) 0.010(5)
C53 0.053(5) 0.065(6) 0.040(5) -0.012(4) 0.006(4) -0.014(4)
C54 0.081(9) 0.111(10) 0.050(6) 0.019(6) 0.005(6) -0.036(7)
 
_geom_special_details
;
 All esds (except the esd in the dihedral angle between two l.s. planes)
 are estimated using the full covariance matrix.  The cell esds are taken
 into account individually in the estimation of esds in distances, angles
 and torsion angles; correlations between esds in cell parameters are only
 used when they are defined by crystal symmetry.  An approximate (isotropic)
 treatment of cell esds is used for estimating esds involving l.s. planes.
;
 
loop_
 _geom_bond_atom_site_label_1
 _geom_bond_atom_site_label_2
 _geom_bond_distance
 _geom_bond_site_symmetry_2
 _geom_bond_publ_flag
Au N2 2.015(6) . ?
Au S2 2.286(2) . ?
Au S1 2.289(2) . ?
Au Cl 2.291(2) . ?
S1 C1 1.733(9) . ?
S2 C3 1.747(8) . ?
N1 C1 1.315(10) . ?
N1 C2 1.336(10) . ?
N2 C2 1.318(9) . ?
N2 N3 1.384(9) . ?
N3 C3 1.297(10) . ?
N4 C3 1.377(11) . ?
N4 C42 1.451(13) . ?
N4 C41 1.466(11) . ?
N5 C1 1.340(10) . ?
N5 C51 1.472(12) . ?
N5 C53 1.476(11) . ?
C2 C21 1.514(11) . ?
C21 C22 1.369(11) . ?
C21 C26 1.387(11) . ?
C22 C23 1.384(13) . ?
C22 H22 0.9300 . ?
C23 C24 1.382(14) . ?
C23 H23 0.9300 . ?
C24 C25 1.360(14) . ?
C24 H24 0.9300 . ?
C25 C26 1.379(12) . ?
C25 H25 0.9300 . ?
C26 H26 0.9300 . ?
C41 H41A 0.9600 . ?
C41 H41B 0.9600 . ?
C41 H41C 0.9600 . ?
C42 H42A 0.9600 . ?
C42 H42B 0.9600 . ?
C42 H42C 0.9600 . ?
C51 C52 1.498(13) . ?
C51 H51A 0.9700 . ?
C51 H51B 0.9700 . ?
C52 H52A 0.9600 . ?
C52 H52B 0.9600 . ?
C52 H52C 0.9600 . ?
C53 C54 1.500(15) . ?
C53 H53A 0.9700 . ?
C53 H53B 0.9700 . ?
C54 H54A 0.9600 . ?
C54 H54B 0.9600 . ?
C54 H54C 0.9600 . ?
 
loop_
 _geom_angle_atom_site_label_1
 _geom_angle_atom_site_label_2
 _geom_angle_atom_site_label_3
 _geom_angle
 _geom_angle_site_symmetry_1
 _geom_angle_site_symmetry_3
 _geom_angle_publ_flag
N2 Au S2 84.81(19) . . ?
N2 Au S1 98.98(19) . . ?
S2 Au S1 176.20(8) . . ?
N2 Au Cl 175.33(18) . . ?
S2 Au Cl 90.69(8) . . ?
S1 Au Cl 85.51(8) . . ?
C1 S1 Au 105.1(3) . . ?
C3 S2 Au 94.9(3) . . ?
C1 N1 C2 133.3(7) . . ?
C2 N2 N3 116.3(6) . . ?
C2 N2 Au 124.2(5) . . ?
N3 N2 Au 119.4(5) . . ?
C3 N3 N2 115.6(7) . . ?
C3 N4 C42 118.4(7) . . ?
C3 N4 C41 121.3(8) . . ?
C42 N4 C41 119.4(8) . . ?
C1 N5 C51 123.0(7) . . ?
C1 N5 C53 120.0(8) . . ?
C51 N5 C53 116.9(7) . . ?
N1 C1 N5 115.2(7) . . ?
N1 C1 S1 128.3(6) . . ?
N5 C1 S1 116.5(6) . . ?
N2 C2 N1 129.2(7) . . ?
N2 C2 C21 119.8(7) . . ?
N1 C2 C21 111.0(6) . . ?
N3 C3 N4 118.2(8) . . ?
N3 C3 S2 125.1(6) . . ?
N4 C3 S2 116.7(6) . . ?
C22 C21 C26 119.4(7) . . ?
C22 C21 C2 117.9(7) . . ?
C26 C21 C2 122.4(7) . . ?
C21 C22 C23 120.5(8) . . ?
C21 C22 H22 119.8 . . ?
C23 C22 H22 119.8 . . ?
C24 C23 C22 119.8(8) . . ?
C24 C23 H23 120.1 . . ?
C22 C23 H23 120.1 . . ?
C25 C24 C23 119.6(8) . . ?
C25 C24 H24 120.2 . . ?
C23 C24 H24 120.2 . . ?
C24 C25 C26 121.0(9) . . ?
C24 C25 H25 119.5 . . ?
C26 C25 H25 119.5 . . ?
C25 C26 C21 119.7(8) . . ?
C25 C26 H26 120.2 . . ?
C21 C26 H26 120.2 . . ?
N4 C41 H41A 109.5 . . ?
N4 C41 H41B 109.5 . . ?
H41A C41 H41B 109.5 . . ?
N4 C41 H41C 109.5 . . ?
H41A C41 H41C 109.5 . . ?
H41B C41 H41C 109.5 . . ?
N4 C42 H42A 109.5 . . ?
N4 C42 H42B 109.5 . . ?
H42A C42 H42B 109.5 . . ?
N4 C42 H42C 109.5 . . ?
H42A C42 H42C 109.5 . . ?
H42B C42 H42C 109.5 . . ?
N5 C51 C52 112.6(8) . . ?
N5 C51 H51A 109.1 . . ?
C52 C51 H51A 109.1 . . ?
N5 C51 H51B 109.1 . . ?
C52 C51 H51B 109.1 . . ?
H51A C51 H51B 107.8 . . ?
C51 C52 H52A 109.5 . . ?
C51 C52 H52B 109.5 . . ?
H52A C52 H52B 109.5 . . ?
C51 C52 H52C 109.5 . . ?
H52A C52 H52C 109.5 . . ?
H52B C52 H52C 109.5 . . ?
N5 C53 C54 113.5(9) . . ?
N5 C53 H53A 108.9 . . ?
C54 C53 H53A 108.9 . . ?
N5 C53 H53B 108.9 . . ?
C54 C53 H53B 108.9 . . ?
H53A C53 H53B 107.7 . . ?
C53 C54 H54A 109.5 . . ?
C53 C54 H54B 109.5 . . ?
H54A C54 H54B 109.5 . . ?
C53 C54 H54C 109.5 . . ?
H54A C54 H54C 109.5 . . ?
H54B C54 H54C 109.5 . . ?
 
_diffrn_measured_fraction_theta_max    0.991
_diffrn_reflns_theta_full              29.21
_diffrn_measured_fraction_theta_full   0.991
_refine_diff_density_max    3.873
_refine_diff_density_min   -2.050
_refine_diff_density_rms    0.663

 
data_aul3scn
 
_audit_creation_method            SHELXL-97
_chemical_name_systematic
;
'(N-(N'',N''-diethylaminothiocarbonyl)-N'(N''', N'''-morpholinecarbothioamide)
benzamidineto)(thiocyanato)gold(III)' 
;
_chemical_name_common             [Au(MORTSC)(SCN)]
_chemical_melting_point           ?
_chemical_formula_moiety          'C18 H23 Au N6 O S3'
_chemical_formula_sum
 'C18 H23 Au N6 O S3'
_chemical_formula_weight          632.57
 
loop_
 _atom_type_symbol
 _atom_type_description
 _atom_type_scat_dispersion_real
 _atom_type_scat_dispersion_imag
 _atom_type_scat_source
 'C'  'C'   0.0033   0.0016
 'International Tables Vol C Tables 4.2.6.8 and 6.1.1.4'
 'H'  'H'   0.0000   0.0000
 'International Tables Vol C Tables 4.2.6.8 and 6.1.1.4'
 'Au'  'Au'  -2.0133   8.8022
 'International Tables Vol C Tables 4.2.6.8 and 6.1.1.4'
 'N'  'N'   0.0061   0.0033
 'International Tables Vol C Tables 4.2.6.8 and 6.1.1.4'
 'O'  'O'   0.0106   0.0060
 'International Tables Vol C Tables 4.2.6.8 and 6.1.1.4'
 'S'  'S'   0.1246   0.1234
 'International Tables Vol C Tables 4.2.6.8 and 6.1.1.4'
 
_symmetry_cell_setting            monoclinic
_symmetry_space_group_name_H-M    'P 21/c'
 
loop_
 _symmetry_equiv_pos_as_xyz
 'x, y, z'
 '-x, y+1/2, -z+1/2'
 '-x, -y, -z'
 'x, -y-1/2, z-1/2'
 
_cell_length_a                    11.833(1)
_cell_length_b                    8.2302(6)
_cell_length_c                    22.484(2)
_cell_angle_alpha                 90.00
_cell_angle_beta                  95.41(1)
_cell_angle_gamma                 90.00
_cell_volume                      2179.9(3)
_cell_formula_units_Z             4
_cell_measurement_temperature     200(2)
_cell_measurement_reflns_used     9578
_cell_measurement_theta_min       2.62
_cell_measurement_theta_max       29.64
 
_exptl_crystal_description       'block'
_exptl_crystal_colour             brown
_exptl_crystal_size_max           0.300
_exptl_crystal_size_mid           0.183
_exptl_crystal_size_min           0.050
_exptl_crystal_density_meas       ?
_exptl_crystal_density_diffrn     1.927
_exptl_crystal_density_method     'not measured'
_exptl_crystal_F_000              1232
_exptl_absorpt_coefficient_mu     7.059
_exptl_absorpt_correction_type    integration
_exptl_absorpt_correction_T_min   0.2120
_exptl_absorpt_correction_T_max   0.7088
_exptl_absorpt_process_details    ?
 
_exptl_special_details
;
 'X-red'
;
 
_diffrn_ambient_temperature       200(2)
_diffrn_radiation_wavelength      0.71073
_diffrn_radiation_type            MoK\a
_diffrn_radiation_source          'fine-focus sealed tube'
_diffrn_radiation_monochromator   graphite
_diffrn_measurement_device_type   'STOE IPDS 2T'
_diffrn_measurement_method        'rotation method'
_diffrn_detector_area_resol_mean  6.67
_diffrn_standards_number          ?
_diffrn_standards_interval_count  ?
_diffrn_standards_interval_time   ?
_diffrn_standards_decay_%         ?
_diffrn_reflns_number             13047
_diffrn_reflns_av_R_equivalents   0.0739
_diffrn_reflns_av_sigmaI/netI     0.0836
_diffrn_reflns_limit_h_min        -16
_diffrn_reflns_limit_h_max        16
_diffrn_reflns_limit_k_min        -11
_diffrn_reflns_limit_k_max        9
_diffrn_reflns_limit_l_min        -27
_diffrn_reflns_limit_l_max        30
_diffrn_reflns_theta_min          1.73
_diffrn_reflns_theta_max          29.27
_reflns_number_total              5836
_reflns_number_gt                 3832
_reflns_threshold_expression      >2sigma(I)
 
_computing_data_collection        'STOE X-AREA'
_computing_cell_refinement        'STOE X-AREA'
_computing_data_reduction         'STOE X-RED'
_computing_structure_solution     'SHELXS-97 (Sheldrick, 1997)'
_computing_structure_refinement   'SHELXL-97 (Sheldrick, 1997)'
_computing_molecular_graphics     'Ortep-3 for Windows (Farrugia, 1997)'
_computing_publication_material   'WinGX publication routines (Farrugia, 1999)'
 
_refine_special_details
;
 Refinement of F^2^ against ALL reflections.  The weighted R-factor wR and
 goodness of fit S are based on F^2^, conventional R-factors R are based
 on F, with F set to zero for negative F^2^. The threshold expression of
 F^2^ > 2sigma(F^2^) is used only for calculating R-factors(gt) etc. and is
 not relevant to the choice of reflections for refinement.  R-factors based
 on F^2^ are statistically about twice as large as those based on F, and R-
 factors based on ALL data will be even larger.
;
 
_refine_ls_structure_factor_coef  Fsqd
_refine_ls_matrix_type            full
_refine_ls_weighting_scheme       calc
_refine_ls_weighting_details
 'calc w=1/[\s^2^(Fo^2^)+(0.1050P)^2^+0.0000P] where P=(Fo^2^+2Fc^2^)/3'
_atom_sites_solution_primary      direct
_atom_sites_solution_secondary    difmap
_atom_sites_solution_hydrogens    geom
_refine_ls_hydrogen_treatment     constr
_refine_ls_extinction_method      SHELXL
_refine_ls_extinction_coef        0.0155(8)
_refine_ls_extinction_expression
 'Fc^*^=kFc[1+0.001xFc^2^\l^3^/sin(2\q)]^-1/4^'
_refine_ls_number_reflns          5836
_refine_ls_number_parameters      265
_refine_ls_number_restraints      0
_refine_ls_R_factor_all           0.0887
_refine_ls_R_factor_gt            0.0559
_refine_ls_wR_factor_ref          0.1669
_refine_ls_wR_factor_gt           0.1336
_refine_ls_goodness_of_fit_ref    0.984
_refine_ls_restrained_S_all       0.984
_refine_ls_shift/su_max           0.000
_refine_ls_shift/su_mean          0.000
 
loop_
 _atom_site_label
 _atom_site_type_symbol
 _atom_site_fract_x
 _atom_site_fract_y
 _atom_site_fract_z
 _atom_site_U_iso_or_equiv
 _atom_site_adp_type
 _atom_site_occupancy
 _atom_site_symmetry_multiplicity
 _atom_site_calc_flag
 _atom_site_refinement_flags
 _atom_site_disorder_assembly
 _atom_site_disorder_group
Au Au 0.90446(3) 0.78587(5) 0.003472(15) 0.03464(16) Uani 1 1 d . . .
S1 S 1.0757(2) 0.7207(5) 0.05383(13) 0.0664(10) Uani 1 1 d . . .
S2 S 0.72879(18) 0.8446(4) -0.04202(11) 0.0414(5) Uani 1 1 d . . .
S3 S 0.8517(2) 0.8025(4) 0.10022(12) 0.0551(8) Uani 1 1 d . . .
O O 0.5104(6) 0.8779(11) -0.2562(3) 0.053(2) Uani 1 1 d . . .
N1 N 1.1515(6) 0.7289(11) -0.0599(4) 0.0398(17) Uani 1 1 d . . .
N2 N 0.9502(6) 0.7702(10) -0.0807(3) 0.0360(16) Uani 1 1 d . . .
N3 N 0.8686(6) 0.7910(11) -0.1287(4) 0.0404(18) Uani 1 1 d . . .
N4 N 0.6852(6) 0.8556(11) -0.1613(3) 0.0381(16) Uani 1 1 d . . .
N5 N 1.2810(6) 0.7310(10) 0.0205(3) 0.0362(16) Uani 1 1 d . . .
N6 N 0.6181(8) 0.8733(14) 0.0901(5) 0.064(3) Uani 1 1 d . . .
C2 C 1.0557(7) 0.7369(12) -0.0948(4) 0.0341(18) Uani 1 1 d . . .
C1 C 1.1733(7) 0.7288(13) -0.0014(4) 0.0353(18) Uani 1 1 d . . .
C3 C 0.7688(7) 0.8249(11) -0.1157(4) 0.0344(19) Uani 1 1 d . . .
C6 C 0.7135(9) 0.8441(15) 0.0922(4) 0.043(2) Uani 1 1 d . . .
C21 C 1.0755(7) 0.7078(13) -0.1591(4) 0.0380(19) Uani 1 1 d . . .
C22 C 1.0101(8) 0.6015(13) -0.1955(4) 0.042(2) Uani 1 1 d . . .
H22 H 0.9490 0.5476 -0.1812 0.051 Uiso 1 1 calc R . .
C23 C 1.0369(9) 0.5761(16) -0.2541(5) 0.051(3) Uani 1 1 d . . .
H23 H 0.9946 0.5030 -0.2786 0.061 Uiso 1 1 calc R . .
C24 C 1.1255(9) 0.6586(17) -0.2757(5) 0.056(3) Uani 1 1 d . . .
H24 H 1.1406 0.6450 -0.3152 0.067 Uiso 1 1 calc R . .
C25 C 1.1915(9) 0.7607(14) -0.2390(5) 0.048(2) Uani 1 1 d . . .
H25 H 1.2529 0.8135 -0.2533 0.057 Uiso 1 1 calc R . .
C26 C 1.1675(8) 0.7857(14) -0.1809(4) 0.042(2) Uani 1 1 d . . .
H26 H 1.2129 0.8547 -0.1562 0.050 Uiso 1 1 calc R . .
C41 C 0.5658(7) 0.8553(15) -0.1501(5) 0.044(2) Uani 1 1 d . . .
H41A H 0.5570 0.9069 -0.1120 0.053 Uiso 1 1 calc R . .
H41B H 0.5387 0.7443 -0.1483 0.053 Uiso 1 1 calc R . .
C42 C 0.7046(8) 0.7985(14) -0.2218(5) 0.045(2) Uani 1 1 d . . .
H42A H 0.6905 0.6826 -0.2250 0.054 Uiso 1 1 calc R . .
H42B H 0.7829 0.8183 -0.2293 0.054 Uiso 1 1 calc R . .
C43 C 0.4970(8) 0.9456(15) -0.1994(5) 0.050(3) Uani 1 1 d . . .
H43A H 0.4175 0.9423 -0.1924 0.059 Uiso 1 1 calc R . .
H43B H 0.5206 1.0585 -0.1990 0.059 Uiso 1 1 calc R . .
C44 C 0.6261(8) 0.8878(15) -0.2672(5) 0.050(3) Uani 1 1 d . . .
H44A H 0.6484 1.0012 -0.2675 0.060 Uiso 1 1 calc R . .
H44B H 0.6347 0.8435 -0.3065 0.060 Uiso 1 1 calc R . .
C51 C 1.3677(9) 0.7201(14) -0.0224(5) 0.046(2) Uani 1 1 d . . .
H51A H 1.4410 0.7473 -0.0018 0.055 Uiso 1 1 calc R . .
H51B H 1.3506 0.8007 -0.0534 0.055 Uiso 1 1 calc R . .
C52 C 1.3762(9) 0.5557(17) -0.0514(6) 0.062(3) Uani 1 1 d . . .
H52A H 1.3843 0.4732 -0.0211 0.093 Uiso 1 1 calc R . .
H52B H 1.4411 0.5538 -0.0740 0.093 Uiso 1 1 calc R . .
H52C H 1.3088 0.5356 -0.0775 0.093 Uiso 1 1 calc R . .
C53 C 1.3214(8) 0.7360(13) 0.0850(4) 0.041(2) Uani 1 1 d . . .
H53A H 1.2717 0.8066 0.1051 0.050 Uiso 1 1 calc R . .
H53B H 1.3967 0.7838 0.0893 0.050 Uiso 1 1 calc R . .
C54 C 1.3264(9) 0.5754(15) 0.1153(6) 0.055(3) Uani 1 1 d . . .
H54A H 1.2509 0.5405 0.1212 0.082 Uiso 1 1 calc R . .
H54B H 1.3704 0.5845 0.1532 0.082 Uiso 1 1 calc R . .
H54C H 1.3611 0.4975 0.0909 0.082 Uiso 1 1 calc R . .
 
loop_
 _atom_site_aniso_label
 _atom_site_aniso_U_11
 _atom_site_aniso_U_22
 _atom_site_aniso_U_33
 _atom_site_aniso_U_23
 _atom_site_aniso_U_13
 _atom_site_aniso_U_12
Au 0.02994(19) 0.0449(2) 0.0286(2) -0.00078(16) 0.00029(11) 0.00341(14)
S1 0.0370(12) 0.129(3) 0.0322(13) 0.0056(16) -0.0007(10) 0.0176(15)
S2 0.0323(10) 0.0579(14) 0.0333(11) -0.0010(11) -0.0012(8) 0.0060(10)
S3 0.0429(12) 0.089(2) 0.0328(12) -0.0030(13) 0.0008(10) 0.0126(13)
O 0.042(3) 0.071(5) 0.042(4) -0.008(4) -0.013(3) 0.006(3)
N1 0.030(3) 0.050(4) 0.039(4) -0.002(4) 0.004(3) 0.004(3)
N2 0.033(3) 0.047(4) 0.028(4) -0.001(3) -0.002(3) 0.004(3)
N3 0.030(3) 0.059(5) 0.030(4) 0.003(4) -0.005(3) 0.004(3)
N4 0.031(3) 0.052(4) 0.030(4) 0.000(4) -0.002(3) 0.004(3)
N5 0.030(3) 0.052(4) 0.026(4) -0.003(3) 0.005(3) 0.001(3)
N6 0.048(5) 0.067(7) 0.078(8) -0.006(6) 0.012(5) 0.003(5)
C2 0.038(4) 0.046(5) 0.019(4) -0.003(3) 0.005(3) -0.004(3)
C1 0.039(4) 0.054(5) 0.015(3) 0.000(4) 0.011(3) 0.006(4)
C3 0.034(4) 0.039(5) 0.029(4) 0.004(3) 0.001(3) -0.003(3)
C6 0.054(5) 0.054(6) 0.023(4) -0.004(4) 0.018(4) 0.003(5)
C21 0.032(4) 0.052(5) 0.030(4) 0.006(4) 0.002(3) 0.006(4)
C22 0.039(4) 0.053(6) 0.034(5) -0.003(4) 0.004(4) 0.000(4)
C23 0.048(5) 0.071(7) 0.034(5) -0.014(5) 0.006(4) 0.003(5)
C24 0.056(6) 0.075(8) 0.038(5) -0.009(6) 0.015(5) 0.008(6)
C25 0.041(5) 0.057(6) 0.046(6) -0.002(5) 0.013(4) -0.003(4)
C26 0.038(4) 0.057(6) 0.032(5) -0.010(5) 0.006(3) -0.005(4)
C41 0.031(4) 0.058(6) 0.042(5) 0.003(5) -0.004(4) 0.002(4)
C42 0.039(4) 0.059(7) 0.037(5) -0.005(5) -0.001(4) 0.002(4)
C43 0.035(4) 0.062(7) 0.049(6) -0.005(5) -0.006(4) 0.004(4)
C44 0.044(5) 0.070(8) 0.035(5) 0.002(5) 0.002(4) -0.007(5)
C51 0.046(5) 0.056(6) 0.035(5) 0.003(5) -0.001(4) -0.013(5)
C52 0.042(5) 0.075(9) 0.067(8) -0.003(7) 0.005(5) 0.011(5)
C53 0.038(4) 0.054(6) 0.032(5) -0.001(4) 0.001(4) 0.002(4)
C54 0.052(5) 0.057(7) 0.053(7) 0.005(6) -0.005(5) 0.005(5)
 
_geom_special_details
;
 All esds (except the esd in the dihedral angle between two l.s. planes)
 are estimated using the full covariance matrix.  The cell esds are taken
 into account individually in the estimation of esds in distances, angles
 and torsion angles; correlations between esds in cell parameters are only
 used when they are defined by crystal symmetry.  An approximate (isotropic)
 treatment of cell esds is used for estimating esds involving l.s. planes.
;
 
loop_
 _geom_bond_atom_site_label_1
 _geom_bond_atom_site_label_2
 _geom_bond_distance
 _geom_bond_site_symmetry_2
 _geom_bond_publ_flag
Au N2 2.022(8) . ?
Au S2 2.280(2) . ?
Au S1 2.290(3) . ?
Au S3 2.323(3) . ?
S1 C1 1.775(9) . ?
S2 C3 1.773(10) . ?
S3 C6 1.664(10) . ?
O C43 1.415(13) . ?
O C44 1.417(12) . ?
N1 C1 1.315(11) . ?
N1 C2 1.319(11) . ?
N2 C2 1.344(12) . ?
N2 N3 1.388(9) . ?
N3 C3 1.273(12) . ?
N4 C3 1.380(10) . ?
N4 C41 1.458(11) . ?
N4 C42 1.478(13) . ?
N5 C1 1.322(11) . ?
N5 C51 1.476(13) . ?
N5 C53 1.483(12) . ?
N6 C6 1.151(13) . ?
C2 C21 1.506(13) . ?
C21 C22 1.384(13) . ?
C21 C26 1.391(14) . ?
C22 C23 1.400(14) . ?
C22 H22 0.9300 . ?
C23 C24 1.375(17) . ?
C23 H23 0.9300 . ?
C24 C25 1.369(17) . ?
C24 H24 0.9300 . ?
C25 C26 1.377(15) . ?
C25 H25 0.9300 . ?
C26 H26 0.9300 . ?
C41 C43 1.508(13) . ?
C41 H41A 0.9700 . ?
C41 H41B 0.9700 . ?
C42 C44 1.506(14) . ?
C42 H42A 0.9700 . ?
C42 H42B 0.9700 . ?
C43 H43A 0.9700 . ?
C43 H43B 0.9700 . ?
C44 H44A 0.9700 . ?
C44 H44B 0.9700 . ?
C51 C52 1.510(17) . ?
C51 H51A 0.9700 . ?
C51 H51B 0.9700 . ?
C52 H52A 0.9600 . ?
C52 H52B 0.9600 . ?
C52 H52C 0.9600 . ?
C53 C54 1.485(15) . ?
C53 H53A 0.9700 . ?
C53 H53B 0.9700 . ?
C54 H54A 0.9600 . ?
C54 H54B 0.9600 . ?
C54 H54C 0.9600 . ?
 
loop_
 _geom_angle_atom_site_label_1
 _geom_angle_atom_site_label_2
 _geom_angle_atom_site_label_3
 _geom_angle
 _geom_angle_site_symmetry_1
 _geom_angle_site_symmetry_3
 _geom_angle_publ_flag
N2 Au S2 84.7(2) . . ?
N2 Au S1 98.3(2) . . ?
S2 Au S1 176.60(10) . . ?
N2 Au S3 179.7(3) . . ?
S2 Au S3 95.37(9) . . ?
S1 Au S3 81.62(10) . . ?
C1 S1 Au 104.4(3) . . ?
C3 S2 Au 95.0(3) . . ?
C6 S3 Au 105.0(3) . . ?
C43 O C44 109.1(7) . . ?
C1 N1 C2 132.2(8) . . ?
C2 N2 N3 115.8(8) . . ?
C2 N2 Au 124.8(6) . . ?
N3 N2 Au 119.4(6) . . ?
C3 N3 N2 116.2(8) . . ?
C3 N4 C41 120.7(8) . . ?
C3 N4 C42 117.6(8) . . ?
C41 N4 C42 113.3(7) . . ?
C1 N5 C51 117.4(7) . . ?
C1 N5 C53 125.2(8) . . ?
C51 N5 C53 117.4(7) . . ?
N1 C2 N2 129.4(8) . . ?
N1 C2 C21 111.2(8) . . ?
N2 C2 C21 119.4(7) . . ?
N1 C1 N5 117.7(8) . . ?
N1 C1 S1 128.3(7) . . ?
N5 C1 S1 114.0(6) . . ?
N3 C3 N4 119.0(9) . . ?
N3 C3 S2 124.7(7) . . ?
N4 C3 S2 116.2(7) . . ?
N6 C6 S3 176.1(10) . . ?
C22 C21 C26 119.7(9) . . ?
C22 C21 C2 122.6(9) . . ?
C26 C21 C2 117.5(8) . . ?
C21 C22 C23 119.1(10) . . ?
C21 C22 H22 120.4 . . ?
C23 C22 H22 120.4 . . ?
C24 C23 C22 120.4(10) . . ?
C24 C23 H23 119.8 . . ?
C22 C23 H23 119.8 . . ?
C25 C24 C23 120.1(11) . . ?
C25 C24 H24 120.0 . . ?
C23 C24 H24 120.0 . . ?
C24 C25 C26 120.4(10) . . ?
C24 C25 H25 119.8 . . ?
C26 C25 H25 119.8 . . ?
C25 C26 C21 120.2(9) . . ?
C25 C26 H26 119.9 . . ?
C21 C26 H26 119.9 . . ?
N4 C41 C43 109.6(9) . . ?
N4 C41 H41A 109.7 . . ?
C43 C41 H41A 109.7 . . ?
N4 C41 H41B 109.7 . . ?
C43 C41 H41B 109.7 . . ?
H41A C41 H41B 108.2 . . ?
N4 C42 C44 109.2(8) . . ?
N4 C42 H42A 109.8 . . ?
C44 C42 H42A 109.8 . . ?
N4 C42 H42B 109.8 . . ?
C44 C42 H42B 109.8 . . ?
H42A C42 H42B 108.3 . . ?
O C43 C41 111.8(9) . . ?
O C43 H43A 109.3 . . ?
C41 C43 H43A 109.3 . . ?
O C43 H43B 109.3 . . ?
C41 C43 H43B 109.3 . . ?
H43A C43 H43B 107.9 . . ?
O C44 C42 113.4(9) . . ?
O C44 H44A 108.9 . . ?
C42 C44 H44A 108.9 . . ?
O C44 H44B 108.9 . . ?
C42 C44 H44B 108.9 . . ?
H44A C44 H44B 107.7 . . ?
N5 C51 C52 114.6(9) . . ?
N5 C51 H51A 108.6 . . ?
C52 C51 H51A 108.6 . . ?
N5 C51 H51B 108.6 . . ?
C52 C51 H51B 108.6 . . ?
H51A C51 H51B 107.6 . . ?
C51 C52 H52A 109.5 . . ?
C51 C52 H52B 109.5 . . ?
H52A C52 H52B 109.5 . . ?
C51 C52 H52C 109.5 . . ?
H52A C52 H52C 109.5 . . ?
H52B C52 H52C 109.5 . . ?
N5 C53 C54 114.8(9) . . ?
N5 C53 H53A 108.6 . . ?
C54 C53 H53A 108.6 . . ?
N5 C53 H53B 108.6 . . ?
C54 C53 H53B 108.6 . . ?
H53A C53 H53B 107.6 . . ?
C53 C54 H54A 109.5 . . ?
C53 C54 H54B 109.5 . . ?
H54A C54 H54B 109.5 . . ?
C53 C54 H54C 109.5 . . ?
H54A C54 H54C 109.5 . . ?
H54B C54 H54C 109.5 . . ?
 
_diffrn_measured_fraction_theta_max    0.981
_diffrn_reflns_theta_full              29.27
_diffrn_measured_fraction_theta_full   0.981
_refine_diff_density_max    1.923
_refine_diff_density_min   -2.941
_refine_diff_density_rms    0.624


 
data_aul3cn
 
_audit_creation_method            SHELXL-97
_chemical_name_systematic
;
'Cyanato(N-(N'',N''-diethylaminothiocarbonyl)-N'(N''', N'''-
morpholinecarbothioamide)benzamidineto)gold(III)' 
;
_chemical_name_common             [Au(MORTSC(CN)]
_chemical_melting_point           ?
_chemical_formula_moiety          'C18 H23 Au N6 O S2'
_chemical_formula_sum
 'C18 H23 Au N6 O S2'
_chemical_formula_weight          600.51
 
loop_
 _atom_type_symbol
 _atom_type_description
 _atom_type_scat_dispersion_real
 _atom_type_scat_dispersion_imag
 _atom_type_scat_source
 'C'  'C'   0.0033   0.0016
 'International Tables Vol C Tables 4.2.6.8 and 6.1.1.4'
 'H'  'H'   0.0000   0.0000
 'International Tables Vol C Tables 4.2.6.8 and 6.1.1.4'
 'Au'  'Au'  -2.0133   8.8022
 'International Tables Vol C Tables 4.2.6.8 and 6.1.1.4'
 'N'  'N'   0.0061   0.0033
 'International Tables Vol C Tables 4.2.6.8 and 6.1.1.4'
 'S'  'S'   0.1246   0.1234
 'International Tables Vol C Tables 4.2.6.8 and 6.1.1.4'
 'O'  'O'   0.0106   0.0060
 'International Tables Vol C Tables 4.2.6.8 and 6.1.1.4'
 
_symmetry_cell_setting            'monoclinic'
_symmetry_space_group_name_H-M    'P 21/c'
 
loop_
 _symmetry_equiv_pos_as_xyz
 'x, y, z'
 '-x, y+1/2, -z+1/2'
 '-x, -y, -z'
 'x, -y-1/2, z-1/2'
 
_cell_length_a                    11.883(1)
_cell_length_b                    14.571(1)
_cell_length_c                    13.368(1)
_cell_angle_alpha                 90.00
_cell_angle_beta                  114.85(1)
_cell_angle_gamma                 90.00
_cell_volume                      2100.4(3)
_cell_formula_units_Z             4
_cell_measurement_temperature     200(2)
_cell_measurement_reflns_used     7556
_cell_measurement_theta_min       2.35
_cell_measurement_theta_max       29.53
 
_exptl_crystal_description        prism
_exptl_crystal_colour             red
_exptl_crystal_size_max           0.155
_exptl_crystal_size_mid           0.110
_exptl_crystal_size_min           0.070
_exptl_crystal_density_meas       ?
_exptl_crystal_density_diffrn     1.899
_exptl_crystal_density_method     'not measured'
_exptl_crystal_F_000              1168
_exptl_absorpt_coefficient_mu     7.224
_exptl_absorpt_correction_type    integration
_exptl_absorpt_correction_T_min   0.3397
_exptl_absorpt_correction_T_max   0.6790
_exptl_absorpt_process_details    ?
 
_exptl_special_details
;
 'X-RED'
;
 
_diffrn_ambient_temperature       200(2)
_diffrn_radiation_wavelength      0.71073
_diffrn_radiation_type            MoK\a
_diffrn_radiation_source          'fine-focus sealed tube'
_diffrn_radiation_monochromator   graphite
_diffrn_measurement_device_type   'STOE IPDS 2T'
_diffrn_measurement_method        'rotation method'
_diffrn_detector_area_resol_mean  6.67
_diffrn_standards_number          ?
_diffrn_standards_interval_count  ?
_diffrn_standards_interval_time   ?
_diffrn_standards_decay_%         ?
_diffrn_reflns_number             13384
_diffrn_reflns_av_R_equivalents   0.0794
_diffrn_reflns_av_sigmaI/netI     0.1042
_diffrn_reflns_limit_h_min        -12
_diffrn_reflns_limit_h_max        16
_diffrn_reflns_limit_k_min        -19
_diffrn_reflns_limit_k_max        17
_diffrn_reflns_limit_l_min        -18
_diffrn_reflns_limit_l_max        18
_diffrn_reflns_theta_min          2.18
_diffrn_reflns_theta_max          29.20
_reflns_number_total              5609
_reflns_number_gt                 3434
_reflns_threshold_expression      >2sigma(I)
 
_computing_data_collection        'STOE X-AREA'
_computing_cell_refinement        'STOE X-AREA'
_computing_data_reduction         'STOE X-RED'
_computing_structure_solution     'SHELXS-97 (Sheldrick, 1997)'
_computing_structure_refinement   'SHELXL-97 (Sheldrick, 1997)'
_computing_molecular_graphics     'Ortep-3 for Windows (Farrugia, 1997)'
_computing_publication_material   'WinGX publication routines (Farrugia, 1999)'
 
_refine_special_details
;
 Refinement of F^2^ against ALL reflections.  The weighted R-factor wR and
 goodness of fit S are based on F^2^, conventional R-factors R are based
 on F, with F set to zero for negative F^2^. The threshold expression of
 F^2^ > 2sigma(F^2^) is used only for calculating R-factors(gt) etc. and is
 not relevant to the choice of reflections for refinement.  R-factors based
 on F^2^ are statistically about twice as large as those based on F, and R-
 factors based on ALL data will be even larger.
;
 
_refine_ls_structure_factor_coef  Fsqd
_refine_ls_matrix_type            full
_refine_ls_weighting_scheme       calc
_refine_ls_weighting_details
 'calc w=1/[\s^2^(Fo^2^)+(0.0496P)^2^+0.0000P] where P=(Fo^2^+2Fc^2^)/3'
_atom_sites_solution_primary      direct
_atom_sites_solution_secondary    difmap
_atom_sites_solution_hydrogens    geom
_refine_ls_hydrogen_treatment     constr
_refine_ls_extinction_method      SHELXL
_refine_ls_extinction_coef        0.0068(3)
_refine_ls_extinction_expression
 'Fc^*^=kFc[1+0.001xFc^2^\l^3^/sin(2\q)]^-1/4^'
_refine_ls_number_reflns          5609
_refine_ls_number_parameters      256
_refine_ls_number_restraints      0
_refine_ls_R_factor_all           0.0799
_refine_ls_R_factor_gt            0.0394
_refine_ls_wR_factor_ref          0.1026
_refine_ls_wR_factor_gt           0.0813
_refine_ls_goodness_of_fit_ref    0.868
_refine_ls_restrained_S_all       0.868
_refine_ls_shift/su_max           0.002
_refine_ls_shift/su_mean          0.000
 
loop_
 _atom_site_label
 _atom_site_type_symbol
 _atom_site_fract_x
 _atom_site_fract_y
 _atom_site_fract_z
 _atom_site_U_iso_or_equiv
 _atom_site_adp_type
 _atom_site_occupancy
 _atom_site_symmetry_multiplicity
 _atom_site_calc_flag
 _atom_site_refinement_flags
 _atom_site_disorder_assembly
 _atom_site_disorder_group
Au1 Au 0.93214(3) 0.98431(2) 0.14923(2) 0.03092(11) Uani 1 1 d . . .
S1 S 0.8539(2) 0.85517(16) 0.19591(19) 0.0475(5) Uani 1 1 d . . .
S2 S 1.02059(19) 1.11043(15) 0.10984(16) 0.0394(5) Uani 1 1 d . . .
O O 0.8968(6) 1.3843(4) -0.1736(5) 0.0507(15) Uani 1 1 d . . .
N1 N 0.6412(6) 0.8994(4) 0.0132(5) 0.0324(13) Uani 1 1 d . . .
N2 N 0.7790(5) 1.0175(4) 0.0136(4) 0.0301(12) Uani 1 1 d . . .
N3 N 0.7819(6) 1.0985(4) -0.0436(5) 0.0337(14) Uani 1 1 d . . .
N4 N 0.8984(7) 1.2168(4) -0.0654(5) 0.0371(15) Uani 1 1 d . . .
N5 N 0.6251(6) 0.7999(4) 0.1363(5) 0.0365(14) Uani 1 1 d . . .
N6 N 1.1756(8) 0.9420(7) 0.3576(6) 0.061(2) Uani 1 1 d . . .
C1 C 0.6969(8) 0.8556(5) 0.1072(6) 0.0346(17) Uani 1 1 d . . .
C2 C 0.6794(7) 0.9677(5) -0.0337(6) 0.0296(16) Uani 1 1 d . . .
C3 C 0.8850(7) 1.1419(5) -0.0077(6) 0.0308(15) Uani 1 1 d . . .
C4 C 1.0897(8) 0.9565(6) 0.2814(6) 0.0404(19) Uani 1 1 d . . .
C21 C 0.5897(6) 0.9828(5) -0.1517(5) 0.0304(14) Uani 1 1 d . . .
C22 C 0.4629(7) 0.9704(5) -0.1815(6) 0.0363(17) Uani 1 1 d . . .
H22 H 0.4345 0.9570 -0.1281 0.044 Uiso 1 1 calc R . .
C23 C 0.3799(8) 0.9784(6) -0.2915(7) 0.0449(19) Uani 1 1 d . . .
H23 H 0.2954 0.9714 -0.3113 0.054 Uiso 1 1 calc R . .
C24 C 0.4213(9) 0.9965(6) -0.3717(6) 0.048(2) Uani 1 1 d . . .
H24 H 0.3651 1.0023 -0.4451 0.058 Uiso 1 1 calc R . .
C25 C 0.5465(9) 1.0060(6) -0.3419(6) 0.046(2) Uani 1 1 d . . .
H25 H 0.5752 1.0165 -0.3958 0.055 Uiso 1 1 calc R . .
C26 C 0.6296(8) 1.0001(5) -0.2326(6) 0.0360(18) Uani 1 1 d . . .
H26 H 0.7139 1.0079 -0.2134 0.043 Uiso 1 1 calc R . .
C41 C 0.7889(8) 1.2455(6) -0.1647(6) 0.0419(19) Uani 1 1 d . . .
H41A H 0.7313 1.2782 -0.1434 0.050 Uiso 1 1 calc R . .
H41B H 0.7470 1.1920 -0.2071 0.050 Uiso 1 1 calc R . .
C42 C 0.8307(9) 1.3072(6) -0.2338(7) 0.047(2) Uani 1 1 d . . .
H42A H 0.8830 1.2725 -0.2595 0.057 Uiso 1 1 calc R . .
H42B H 0.7587 1.3279 -0.2979 0.057 Uiso 1 1 calc R . .
C43 C 1.0049(9) 1.3551(6) -0.0803(7) 0.049(2) Uani 1 1 d . . .
H43A H 1.0503 1.4085 -0.0402 0.058 Uiso 1 1 calc R . .
H43B H 1.0585 1.3210 -0.1053 0.058 Uiso 1 1 calc R . .
C44 C 0.9719(8) 1.2958(6) -0.0050(7) 0.046(2) Uani 1 1 d . . .
H44A H 1.0470 1.2746 0.0556 0.055 Uiso 1 1 calc R . .
H44B H 0.9247 1.3314 0.0255 0.055 Uiso 1 1 calc R . .
C51 C 0.6753(9) 0.7389(6) 0.2316(7) 0.047(2) Uani 1 1 d . . .
H51A H 0.7593 0.7222 0.2446 0.056 Uiso 1 1 calc R . .
H51B H 0.6263 0.6831 0.2148 0.056 Uiso 1 1 calc R . .
C52 C 0.6767(12) 0.7805(8) 0.3352(8) 0.072(3) Uani 1 1 d . . .
H52A H 0.7221 0.8371 0.3509 0.109 Uiso 1 1 calc R . .
H52B H 0.7156 0.7387 0.3956 0.109 Uiso 1 1 calc R . .
H52C H 0.5931 0.7921 0.3253 0.109 Uiso 1 1 calc R . .
C53 C 0.4909(9) 0.7972(6) 0.0725(7) 0.046(2) Uani 1 1 d . . .
H53A H 0.4630 0.8566 0.0382 0.055 Uiso 1 1 calc R . .
H53B H 0.4517 0.7860 0.1219 0.055 Uiso 1 1 calc R . .
C54 C 0.4506(12) 0.7249(8) -0.0149(9) 0.071(3) Uani 1 1 d . . .
H54A H 0.4710 0.7438 -0.0742 0.106 Uiso 1 1 calc R . .
H54B H 0.3627 0.7161 -0.0424 0.106 Uiso 1 1 calc R . .
H54C H 0.4924 0.6683 0.0157 0.106 Uiso 1 1 calc R . .
 
loop_
 _atom_site_aniso_label
 _atom_site_aniso_U_11
 _atom_site_aniso_U_22
 _atom_site_aniso_U_33
 _atom_site_aniso_U_23
 _atom_site_aniso_U_13
 _atom_site_aniso_U_12
Au1 0.02788(14) 0.03302(16) 0.03202(14) 0.00168(13) 0.01275(10) 0.00038(15)
S1 0.0336(11) 0.0464(13) 0.0578(12) 0.0213(10) 0.0146(9) -0.0003(10)
S2 0.0316(10) 0.0408(12) 0.0404(10) 0.0027(8) 0.0098(8) -0.0073(9)
O 0.056(4) 0.034(3) 0.064(4) 0.008(3) 0.027(3) -0.005(3)
N1 0.031(3) 0.032(4) 0.035(3) 0.000(2) 0.015(3) -0.002(3)
N2 0.027(3) 0.029(3) 0.034(3) 0.001(3) 0.012(2) 0.002(3)
N3 0.033(4) 0.029(3) 0.036(3) 0.004(2) 0.012(3) -0.003(3)
N4 0.040(4) 0.031(4) 0.038(3) 0.004(3) 0.014(3) -0.010(3)
N5 0.032(4) 0.030(4) 0.047(4) 0.001(3) 0.017(3) -0.002(3)
N6 0.045(5) 0.080(6) 0.053(4) 0.011(4) 0.017(4) 0.002(4)
C1 0.037(4) 0.025(4) 0.045(4) 0.004(3) 0.020(3) 0.004(3)
C2 0.033(4) 0.024(4) 0.036(3) -0.004(3) 0.017(3) -0.003(3)
C3 0.032(4) 0.027(4) 0.038(4) -0.004(3) 0.019(3) -0.002(3)
C4 0.034(4) 0.049(5) 0.041(4) 0.013(3) 0.018(4) 0.009(4)
C21 0.030(4) 0.027(3) 0.034(3) 0.000(3) 0.013(3) -0.002(3)
C22 0.037(4) 0.028(5) 0.043(4) 0.001(3) 0.016(3) 0.000(3)
C23 0.034(4) 0.039(5) 0.047(4) -0.003(4) 0.003(3) -0.003(4)
C24 0.055(6) 0.043(6) 0.032(4) 0.004(3) 0.004(4) 0.002(4)
C25 0.061(6) 0.034(5) 0.040(4) 0.005(3) 0.018(4) 0.000(4)
C26 0.043(4) 0.024(5) 0.041(4) 0.002(3) 0.017(3) -0.003(3)
C41 0.034(4) 0.041(5) 0.044(4) 0.009(3) 0.011(3) -0.005(4)
C42 0.053(6) 0.033(5) 0.056(5) 0.005(4) 0.023(4) -0.002(4)
C43 0.046(5) 0.035(5) 0.061(5) 0.005(4) 0.018(4) -0.011(4)
C44 0.047(6) 0.037(5) 0.045(4) -0.002(3) 0.011(4) -0.016(4)
C51 0.050(5) 0.034(5) 0.058(5) 0.017(4) 0.023(4) -0.002(4)
C52 0.082(9) 0.084(8) 0.062(6) 0.033(6) 0.041(6) 0.010(7)
C53 0.044(5) 0.042(5) 0.054(5) 0.006(4) 0.023(4) -0.005(4)
C54 0.073(8) 0.057(7) 0.069(7) 0.009(5) 0.017(6) -0.009(6)
 
_geom_special_details
;
 All esds (except the esd in the dihedral angle between two l.s. planes)
 are estimated using the full covariance matrix.  The cell esds are taken
 into account individually in the estimation of esds in distances, angles
 and torsion angles; correlations between esds in cell parameters are only
 used when they are defined by crystal symmetry.  An approximate (isotropic)
 treatment of cell esds is used for estimating esds involving l.s. planes.
;
 
loop_
 _geom_bond_atom_site_label_1
 _geom_bond_atom_site_label_2
 _geom_bond_distance
 _geom_bond_site_symmetry_2
 _geom_bond_publ_flag
Au1 C4 2.003(8) . ?
Au1 N2 2.015(6) . ?
Au1 S2 2.286(2) . ?
Au1 S1 2.298(2) . ?
S1 C1 1.739(8) . ?
S2 C3 1.775(8) . ?
O C42 1.412(11) . ?
O C43 1.428(11) . ?
N1 C1 1.315(9) . ?
N1 C2 1.352(9) . ?
N2 C2 1.302(9) . ?
N2 N3 1.415(8) . ?
N3 C3 1.280(10) . ?
N4 C3 1.383(9) . ?
N4 C44 1.466(10) . ?
N4 C41 1.476(10) . ?
N5 C1 1.348(10) . ?
N5 C53 1.458(11) . ?
N5 C51 1.459(10) . ?
N6 C4 1.118(11) . ?
C2 C21 1.503(10) . ?
C21 C26 1.373(10) . ?
C21 C22 1.399(10) . ?
C22 C23 1.390(11) . ?
C22 H22 0.9300 . ?
C23 C24 1.380(13) . ?
C23 H23 0.9300 . ?
C24 C25 1.376(13) . ?
C24 H24 0.9300 . ?
C25 C26 1.381(11) . ?
C25 H25 0.9300 . ?
C26 H26 0.9300 . ?
C41 C42 1.514(12) . ?
C41 H41A 0.9700 . ?
C41 H41B 0.9700 . ?
C42 H42A 0.9700 . ?
C42 H42B 0.9700 . ?
C43 C44 1.499(12) . ?
C43 H43A 0.9700 . ?
C43 H43B 0.9700 . ?
C44 H44A 0.9700 . ?
C44 H44B 0.9700 . ?
C51 C52 1.506(14) . ?
C51 H51A 0.9700 . ?
C51 H51B 0.9700 . ?
C52 H52A 0.9600 . ?
C52 H52B 0.9600 . ?
C52 H52C 0.9600 . ?
C53 C54 1.495(14) . ?
C53 H53A 0.9700 . ?
C53 H53B 0.9700 . ?
C54 H54A 0.9600 . ?
C54 H54B 0.9600 . ?
C54 H54C 0.9600 . ?
 
loop_
 _geom_angle_atom_site_label_1
 _geom_angle_atom_site_label_2
 _geom_angle_atom_site_label_3
 _geom_angle
 _geom_angle_site_symmetry_1
 _geom_angle_site_symmetry_3
 _geom_angle_publ_flag
C4 Au1 N2 176.8(3) . . ?
C4 Au1 S2 90.9(3) . . ?
N2 Au1 S2 85.93(19) . . ?
C4 Au1 S1 86.0(3) . . ?
N2 Au1 S1 97.18(19) . . ?
S2 Au1 S1 176.84(8) . . ?
C1 S1 Au1 104.6(3) . . ?
C3 S2 Au1 94.4(3) . . ?
C42 O C43 110.0(7) . . ?
C1 N1 C2 131.9(7) . . ?
C2 N2 N3 115.2(6) . . ?
C2 N2 Au1 126.6(5) . . ?
N3 N2 Au1 117.9(5) . . ?
C3 N3 N2 116.6(6) . . ?
C3 N4 C44 119.6(6) . . ?
C3 N4 C41 117.4(7) . . ?
C44 N4 C41 111.6(6) . . ?
C1 N5 C53 121.1(7) . . ?
C1 N5 C51 122.8(7) . . ?
C53 N5 C51 116.1(7) . . ?
N1 C1 N5 116.3(7) . . ?
N1 C1 S1 128.2(6) . . ?
N5 C1 S1 115.4(6) . . ?
N2 C2 N1 126.7(6) . . ?
N2 C2 C21 121.8(6) . . ?
N1 C2 C21 111.5(6) . . ?
N3 C3 N4 119.9(7) . . ?
N3 C3 S2 125.0(6) . . ?
N4 C3 S2 115.0(6) . . ?
N6 C4 Au1 177.5(8) . . ?
C26 C21 C22 119.1(7) . . ?
C26 C21 C2 121.7(7) . . ?
C22 C21 C2 118.9(6) . . ?
C23 C22 C21 119.4(8) . . ?
C23 C22 H22 120.3 . . ?
C21 C22 H22 120.3 . . ?
C24 C23 C22 120.8(9) . . ?
C24 C23 H23 119.6 . . ?
C22 C23 H23 119.6 . . ?
C25 C24 C23 119.3(7) . . ?
C25 C24 H24 120.3 . . ?
C23 C24 H24 120.3 . . ?
C24 C25 C26 120.4(8) . . ?
C24 C25 H25 119.8 . . ?
C26 C25 H25 119.8 . . ?
C21 C26 C25 121.0(8) . . ?
C21 C26 H26 119.5 . . ?
C25 C26 H26 119.5 . . ?
N4 C41 C42 109.0(7) . . ?
N4 C41 H41A 109.9 . . ?
C42 C41 H41A 109.9 . . ?
N4 C41 H41B 109.9 . . ?
C42 C41 H41B 109.9 . . ?
H41A C41 H41B 108.3 . . ?
O C42 C41 111.8(7) . . ?
O C42 H42A 109.3 . . ?
C41 C42 H42A 109.3 . . ?
O C42 H42B 109.3 . . ?
C41 C42 H42B 109.3 . . ?
H42A C42 H42B 107.9 . . ?
O C43 C44 111.4(8) . . ?
O C43 H43A 109.4 . . ?
C44 C43 H43A 109.4 . . ?
O C43 H43B 109.4 . . ?
C44 C43 H43B 109.4 . . ?
H43A C43 H43B 108.0 . . ?
N4 C44 C43 110.2(7) . . ?
N4 C44 H44A 109.6 . . ?
C43 C44 H44A 109.6 . . ?
N4 C44 H44B 109.6 . . ?
C43 C44 H44B 109.6 . . ?
H44A C44 H44B 108.1 . . ?
N5 C51 C52 113.6(8) . . ?
N5 C51 H51A 108.8 . . ?
C52 C51 H51A 108.8 . . ?
N5 C51 H51B 108.8 . . ?
C52 C51 H51B 108.8 . . ?
H51A C51 H51B 107.7 . . ?
C51 C52 H52A 109.5 . . ?
C51 C52 H52B 109.5 . . ?
H52A C52 H52B 109.5 . . ?
C51 C52 H52C 109.5 . . ?
H52A C52 H52C 109.5 . . ?
H52B C52 H52C 109.5 . . ?
N5 C53 C54 112.9(8) . . ?
N5 C53 H53A 109.0 . . ?
C54 C53 H53A 109.0 . . ?
N5 C53 H53B 109.0 . . ?
C54 C53 H53B 109.0 . . ?
H53A C53 H53B 107.8 . . ?
C53 C54 H54A 109.5 . . ?
C53 C54 H54B 109.5 . . ?
H54A C54 H54B 109.5 . . ?
C53 C54 H54C 109.5 . . ?
H54A C54 H54C 109.5 . . ?
H54B C54 H54C 109.5 . . ?
 
_diffrn_measured_fraction_theta_max    0.986
_diffrn_reflns_theta_full              29.20
_diffrn_measured_fraction_theta_full   0.986
_refine_diff_density_max    1.700
_refine_diff_density_min   -1.293
_refine_diff_density_rms    0.349


 
data_aul4cn
 
_audit_creation_method            SHELXL-97
_chemical_name_systematic
;
'Cyanato(N-(N'',N''-diethylaminothiocarbonyl)-N'(N''', N'''-
hexamethylenecarbothioamide)benzamidineto)gold(III)' 
;
_chemical_name_common             [Au(AZPTSC)(CN)]
_chemical_melting_point           ?
_chemical_formula_moiety          'C20 H27 Au N6 S2'
_chemical_formula_sum
 'C20 H27 Au N6 S2'
_chemical_formula_weight          612.56
 
loop_
 _atom_type_symbol
 _atom_type_description
 _atom_type_scat_dispersion_real
 _atom_type_scat_dispersion_imag
 _atom_type_scat_source
 'C'  'C'   0.0033   0.0016
 'International Tables Vol C Tables 4.2.6.8 and 6.1.1.4'
 'H'  'H'   0.0000   0.0000
 'International Tables Vol C Tables 4.2.6.8 and 6.1.1.4'
 'Au'  'Au'  -2.0133   8.8022
 'International Tables Vol C Tables 4.2.6.8 and 6.1.1.4'
 'N'  'N'   0.0061   0.0033
 'International Tables Vol C Tables 4.2.6.8 and 6.1.1.4'
 'S'  'S'   0.1246   0.1234
 'International Tables Vol C Tables 4.2.6.8 and 6.1.1.4'
 
_symmetry_cell_setting            orthorhombic
_symmetry_space_group_name_H-M    'P b c a'
 
loop_
 _symmetry_equiv_pos_as_xyz
 'x, y, z'
 '-x+1/2, -y, z+1/2'
 'x+1/2, -y+1/2, -z'
 '-x, y+1/2, -z+1/2'
 '-x, -y, -z'
 'x-1/2, y, -z-1/2'
 '-x-1/2, y-1/2, z'
 'x, -y-1/2, z-1/2'
 
_cell_length_a                    13.927(1)
_cell_length_b                    9.670(1)
_cell_length_c                    33.253(3)
_cell_angle_alpha                 90.00
_cell_angle_beta                  90.00
_cell_angle_gamma                 90.00
_cell_volume                      4478.4(7)
_cell_formula_units_Z             8
_cell_measurement_temperature     200(2)
_cell_measurement_reflns_used     11710
_cell_measurement_theta_min       1.91
_cell_measurement_theta_max       29.70
 
_exptl_crystal_description        'block'
_exptl_crystal_colour             'dark red'
_exptl_crystal_size_max           0.170
_exptl_crystal_size_mid           0.122
_exptl_crystal_size_min           0.091
_exptl_crystal_density_meas       ?
_exptl_crystal_density_diffrn     1.817
_exptl_crystal_density_method     'not measured'
_exptl_crystal_F_000              2400
_exptl_absorpt_coefficient_mu     6.775
_exptl_absorpt_correction_type    integration
_exptl_absorpt_correction_T_min   0.1816
_exptl_absorpt_correction_T_max   0.4418
_exptl_absorpt_process_details    ?
 
_exptl_special_details
;
 'X-RED'
;
 
_diffrn_ambient_temperature       200(2)
_diffrn_radiation_wavelength      0.71073
_diffrn_radiation_type            MoK\a
_diffrn_radiation_source          'fine-focus sealed tube'
_diffrn_radiation_monochromator   graphite
_diffrn_measurement_device_type   'STOE IPDS 2T'
_diffrn_measurement_method        'rotation method'
_diffrn_detector_area_resol_mean  6.67
_diffrn_standards_number          ?
_diffrn_standards_interval_count  ?
_diffrn_standards_interval_time   ?
_diffrn_standards_decay_%         ?
_diffrn_reflns_number             13768
_diffrn_reflns_av_R_equivalents   0.0605
_diffrn_reflns_av_sigmaI/netI     0.0456
_diffrn_reflns_limit_h_min        -14
_diffrn_reflns_limit_h_max        19
_diffrn_reflns_limit_k_min        -13
_diffrn_reflns_limit_k_max        11
_diffrn_reflns_limit_l_min        -45
_diffrn_reflns_limit_l_max        28
_diffrn_reflns_theta_min          1.91
_diffrn_reflns_theta_max          29.27
_reflns_number_total              5927
_reflns_number_gt                 4268
_reflns_threshold_expression      >2sigma(I)
 
_computing_data_collection        'STOE X-AREA'
_computing_cell_refinement        'STOE X-AREA'
_computing_data_reduction         'STOE X-RED'
_computing_structure_solution     'SHELXS-97 (Sheldrick, 1997)'
_computing_structure_refinement   'SHELXL-97 (Sheldrick, 1997)'
_computing_molecular_graphics     'Ortep-3 for Windows (Farrugia, 1997)'
_computing_publication_material   'WinGX publication routines (Farrugia, 1999)'
 
_refine_special_details
;
 Refinement of F^2^ against ALL reflections.  The weighted R-factor wR and
 goodness of fit S are based on F^2^, conventional R-factors R are based
 on F, with F set to zero for negative F^2^. The threshold expression of
 F^2^ > 2sigma(F^2^) is used only for calculating R-factors(gt) etc. and is
 not relevant to the choice of reflections for refinement.  R-factors based
 on F^2^ are statistically about twice as large as those based on F, and R-
 factors based on ALL data will be even larger.
;
 
_refine_ls_structure_factor_coef  Fsqd
_refine_ls_matrix_type            full
_refine_ls_weighting_scheme       calc
_refine_ls_weighting_details
 'calc w=1/[\s^2^(Fo^2^)+(0.1365P)^2^+0.0000P] where P=(Fo^2^+2Fc^2^)/3'
_atom_sites_solution_primary      direct
_atom_sites_solution_secondary    difmap
_atom_sites_solution_hydrogens    geom
_refine_ls_hydrogen_treatment     constr
_refine_ls_extinction_method      SHELXL
_refine_ls_extinction_coef        0.0090(5)
_refine_ls_extinction_expression
 'Fc^*^=kFc[1+0.001xFc^2^\l^3^/sin(2\q)]^-1/4^'
_refine_ls_number_reflns          5927
_refine_ls_number_parameters      265
_refine_ls_number_restraints      0
_refine_ls_R_factor_all           0.0875
_refine_ls_R_factor_gt            0.0631
_refine_ls_wR_factor_ref          0.1970
_refine_ls_wR_factor_gt           0.1628
_refine_ls_goodness_of_fit_ref    1.027
_refine_ls_restrained_S_all       1.027
_refine_ls_shift/su_max           0.000
_refine_ls_shift/su_mean          0.000
 
loop_
 _atom_site_label
 _atom_site_type_symbol
 _atom_site_fract_x
 _atom_site_fract_y
 _atom_site_fract_z
 _atom_site_U_iso_or_equiv
 _atom_site_adp_type
 _atom_site_occupancy
 _atom_site_symmetry_multiplicity
 _atom_site_calc_flag
 _atom_site_refinement_flags
 _atom_site_disorder_assembly
 _atom_site_disorder_group
Au1 Au -0.32245(2) 0.43466(3) 0.129024(9) 0.04330(17) Uani 1 1 d . . .
S1 S -0.32431(13) 0.5973(3) 0.17906(7) 0.0525(5) Uani 1 1 d . . .
S2 S -0.32968(13) 0.2727(2) 0.07899(7) 0.0512(5) Uani 1 1 d . . .
N1 N -0.1262(4) 0.5728(6) 0.1750(2) 0.0481(14) Uani 1 1 d . . .
N2 N -0.1786(4) 0.4205(8) 0.1233(2) 0.0438(16) Uani 1 1 d . . .
N3 N -0.1428(5) 0.3375(7) 0.09179(19) 0.0519(14) Uani 1 1 d . . .
N4 N -0.1711(5) 0.1681(8) 0.0457(2) 0.0573(17) Uani 1 1 d . . .
N5 N -0.1902(4) 0.7205(8) 0.2201(2) 0.0526(16) Uani 1 1 d . . .
N6 N -0.5433(7) 0.4390(9) 0.1360(3) 0.074(3) Uani 1 1 d . . .
C1 C -0.2052(6) 0.6292(8) 0.1907(2) 0.0494(16) Uani 1 1 d . . .
C2 C -0.1136(5) 0.4824(7) 0.1453(2) 0.0431(14) Uani 1 1 d . . .
C3 C -0.2029(6) 0.2634(8) 0.0727(2) 0.0472(15) Uani 1 1 d . . .
C4 C -0.4659(7) 0.4358(9) 0.1333(3) 0.056(2) Uani 1 1 d . . .
C21 C -0.0095(6) 0.4515(8) 0.1391(2) 0.0433(15) Uani 1 1 d . . .
C22 C 0.0556(7) 0.5590(8) 0.1359(3) 0.054(2) Uani 1 1 d . . .
H22 H 0.0335 0.6497 0.1364 0.065 Uiso 1 1 calc R . .
C23 C 0.1512(8) 0.5348(12) 0.1320(3) 0.062(2) Uani 1 1 d . . .
H23 H 0.1934 0.6088 0.1296 0.075 Uiso 1 1 calc R . .
C24 C 0.1863(6) 0.4016(15) 0.1318(3) 0.061(2) Uani 1 1 d . . .
H24 H 0.2518 0.3857 0.1291 0.074 Uiso 1 1 calc R . .
C25 C 0.1245(6) 0.2941(10) 0.1353(3) 0.059(2) Uani 1 1 d . . .
H25 H 0.1481 0.2041 0.1353 0.071 Uiso 1 1 calc R . .
C26 C 0.0277(6) 0.3164(9) 0.1390(3) 0.0556(18) Uani 1 1 d . . .
H26 H -0.0138 0.2415 0.1416 0.067 Uiso 1 1 calc R . .
C41 C -0.0669(6) 0.1528(11) 0.0408(3) 0.066(2) Uani 1 1 d . . .
H41A H -0.0541 0.0626 0.0292 0.079 Uiso 1 1 calc R . .
H41B H -0.0373 0.1550 0.0672 0.079 Uiso 1 1 calc R . .
C42 C -0.0192(8) 0.2618(12) 0.0147(3) 0.079(3) Uani 1 1 d . . .
H42A H -0.0076 0.3432 0.0310 0.095 Uiso 1 1 calc R . .
H42B H 0.0428 0.2268 0.0061 0.095 Uiso 1 1 calc R . .
C43 C -0.0734(10) 0.3040(16) -0.0212(5) 0.114(5) Uani 1 1 d . . .
H43A H -0.0268 0.3330 -0.0411 0.137 Uiso 1 1 calc R . .
H43B H -0.1100 0.3856 -0.0139 0.137 Uiso 1 1 calc R . .
C44 C -0.1416(13) 0.2069(17) -0.0418(4) 0.114(5) Uani 1 1 d . . .
H44A H -0.1564 0.2475 -0.0677 0.136 Uiso 1 1 calc R . .
H44B H -0.1061 0.1226 -0.0471 0.136 Uiso 1 1 calc R . .
C45 C -0.2293(10) 0.1672(15) -0.0246(3) 0.093(4) Uani 1 1 d . . .
H45A H -0.2597 0.1034 -0.0432 0.111 Uiso 1 1 calc R . .
H45B H -0.2696 0.2490 -0.0236 0.111 Uiso 1 1 calc R . .
C46 C -0.2330(8) 0.1011(9) 0.0165(3) 0.066(2) Uani 1 1 d . . .
H46A H -0.2986 0.1039 0.0263 0.079 Uiso 1 1 calc R . .
H46B H -0.2145 0.0048 0.0142 0.079 Uiso 1 1 calc R . .
C51 C -0.2696(7) 0.7942(9) 0.2409(3) 0.063(2) Uani 1 1 d . . .
H51A H -0.2474 0.8857 0.2484 0.076 Uiso 1 1 calc R . .
H51B H -0.3224 0.8056 0.2222 0.076 Uiso 1 1 calc R . .
C52 C -0.3059(8) 0.7241(16) 0.2772(3) 0.084(3) Uani 1 1 d . . .
H52A H -0.3540 0.7807 0.2898 0.125 Uiso 1 1 calc R . .
H52B H -0.2539 0.7093 0.2957 0.125 Uiso 1 1 calc R . .
H52C H -0.3335 0.6367 0.2699 0.125 Uiso 1 1 calc R . .
C53 C -0.0927(6) 0.7433(12) 0.2357(3) 0.073(3) Uani 1 1 d . . .
H53A H -0.0498 0.7567 0.2130 0.087 Uiso 1 1 calc R . .
H53B H -0.0926 0.8282 0.2512 0.087 Uiso 1 1 calc R . .
C54 C -0.0544(9) 0.6321(19) 0.2608(4) 0.106(4) Uani 1 1 d . . .
H54A H 0.0062 0.6601 0.2719 0.158 Uiso 1 1 calc R . .
H54B H -0.0457 0.5505 0.2448 0.158 Uiso 1 1 calc R . .
H54C H -0.0986 0.6129 0.2823 0.158 Uiso 1 1 calc R . .
 
loop_
 _atom_site_aniso_label
 _atom_site_aniso_U_11
 _atom_site_aniso_U_22
 _atom_site_aniso_U_33
 _atom_site_aniso_U_23
 _atom_site_aniso_U_13
 _atom_site_aniso_U_12
Au1 0.0357(2) 0.0466(2) 0.0476(2) -0.00021(10) -0.00211(10) 0.00058(10)
S1 0.0370(9) 0.0630(11) 0.0575(11) -0.0114(9) -0.0015(8) 0.0052(8)
S2 0.0444(9) 0.0538(10) 0.0555(11) -0.0056(8) -0.0050(7) -0.0038(8)
N1 0.033(3) 0.062(4) 0.050(3) -0.009(3) 0.005(3) 0.003(3)
N2 0.021(3) 0.064(4) 0.046(3) -0.006(3) -0.003(2) 0.001(2)
N3 0.053(3) 0.057(4) 0.045(3) -0.007(3) 0.006(3) -0.003(3)
N4 0.053(4) 0.063(4) 0.056(4) -0.014(3) 0.003(3) 0.000(3)
N5 0.038(3) 0.060(4) 0.060(4) -0.009(3) -0.003(3) 0.001(3)
N6 0.042(5) 0.086(7) 0.093(7) -0.011(4) -0.014(4) -0.005(4)
C1 0.047(4) 0.053(4) 0.048(4) -0.001(3) -0.001(3) 0.006(3)
C2 0.039(3) 0.044(3) 0.047(3) 0.008(3) -0.003(3) 0.002(3)
C3 0.051(4) 0.044(3) 0.046(4) -0.001(3) 0.002(3) -0.002(3)
C4 0.031(4) 0.067(6) 0.072(6) -0.007(4) -0.002(4) -0.003(3)
C21 0.037(4) 0.052(4) 0.041(3) -0.001(3) -0.003(3) -0.005(3)
C22 0.043(4) 0.047(4) 0.072(5) -0.006(3) -0.004(4) -0.005(3)
C23 0.045(4) 0.068(5) 0.073(6) -0.007(4) 0.004(4) -0.011(5)
C24 0.025(4) 0.099(7) 0.061(6) -0.010(4) 0.003(3) 0.002(4)
C25 0.044(4) 0.066(5) 0.067(5) 0.002(4) 0.004(4) 0.016(4)
C26 0.046(4) 0.055(4) 0.065(5) 0.003(4) -0.003(4) 0.001(4)
C41 0.052(5) 0.082(6) 0.065(5) -0.020(4) 0.003(4) 0.007(4)
C42 0.073(6) 0.086(6) 0.079(7) -0.022(5) 0.021(5) -0.001(5)
C43 0.082(8) 0.122(11) 0.139(13) 0.051(10) 0.022(8) -0.007(8)
C44 0.150(14) 0.133(13) 0.057(6) -0.002(7) 0.001(8) -0.033(11)
C45 0.084(8) 0.131(10) 0.062(6) -0.002(6) -0.014(6) -0.011(8)
C46 0.075(6) 0.055(4) 0.066(5) -0.016(4) 0.003(5) -0.004(4)
C51 0.053(5) 0.058(5) 0.079(6) -0.011(4) 0.006(4) 0.004(4)
C52 0.073(7) 0.117(10) 0.060(6) -0.004(6) -0.001(5) 0.013(6)
C53 0.049(5) 0.094(6) 0.076(6) -0.031(5) -0.008(4) 0.002(5)
C54 0.061(6) 0.191(14) 0.064(6) -0.012(8) -0.019(5) 0.027(8)
 
_geom_special_details
;
 All esds (except the esd in the dihedral angle between two l.s. planes)
 are estimated using the full covariance matrix.  The cell esds are taken
 into account individually in the estimation of esds in distances, angles
 and torsion angles; correlations between esds in cell parameters are only
 used when they are defined by crystal symmetry.  An approximate (isotropic)
 treatment of cell esds is used for estimating esds involving l.s. planes.
;
 
loop_
 _geom_bond_atom_site_label_1
 _geom_bond_atom_site_label_2
 _geom_bond_distance
 _geom_bond_site_symmetry_2
 _geom_bond_publ_flag
Au1 C4 2.003(10) . ?
Au1 N2 2.017(6) . ?
Au1 S2 2.287(2) . ?
Au1 S1 2.290(2) . ?
S1 C1 1.731(8) . ?
S2 C3 1.781(8) . ?
N1 C2 1.329(10) . ?
N1 C1 1.335(10) . ?
N2 C2 1.309(10) . ?
N2 N3 1.410(9) . ?
N3 C3 1.271(10) . ?
N4 C3 1.360(10) . ?
N4 C46 1.451(11) . ?
N4 C41 1.468(11) . ?
N5 C1 1.333(10) . ?
N5 C53 1.469(10) . ?
N5 C51 1.487(10) . ?
N6 C4 1.082(15) . ?
C2 C21 1.495(11) . ?
C21 C22 1.384(11) . ?
C21 C26 1.405(11) . ?
C22 C23 1.357(14) . ?
C22 H22 0.9300 . ?
C23 C24 1.377(16) . ?
C23 H23 0.9300 . ?
C24 C25 1.354(16) . ?
C24 H24 0.9300 . ?
C25 C26 1.372(12) . ?
C25 H25 0.9300 . ?
C26 H26 0.9300 . ?
C41 C42 1.519(15) . ?
C41 H41A 0.9700 . ?
C41 H41B 0.9700 . ?
C42 C43 1.469(18) . ?
C42 H42A 0.9700 . ?
C42 H42B 0.9700 . ?
C43 C44 1.50(2) . ?
C43 H43A 0.9700 . ?
C43 H43B 0.9700 . ?
C44 C45 1.40(2) . ?
C44 H44A 0.9700 . ?
C44 H44B 0.9700 . ?
C45 C46 1.511(15) . ?
C45 H45A 0.9700 . ?
C45 H45B 0.9700 . ?
C46 H46A 0.9700 . ?
C46 H46B 0.9700 . ?
C51 C52 1.474(15) . ?
C51 H51A 0.9700 . ?
C51 H51B 0.9700 . ?
C52 H52A 0.9600 . ?
C52 H52B 0.9600 . ?
C52 H52C 0.9600 . ?
C53 C54 1.463(19) . ?
C53 H53A 0.9700 . ?
C53 H53B 0.9700 . ?
C54 H54A 0.9600 . ?
C54 H54B 0.9600 . ?
C54 H54C 0.9600 . ?
 
loop_
 _geom_angle_atom_site_label_1
 _geom_angle_atom_site_label_2
 _geom_angle_atom_site_label_3
 _geom_angle
 _geom_angle_site_symmetry_1
 _geom_angle_site_symmetry_3
 _geom_angle_publ_flag
C4 Au1 N2 176.2(3) . . ?
C4 Au1 S2 90.7(3) . . ?
N2 Au1 S2 85.9(2) . . ?
C4 Au1 S1 86.2(3) . . ?
N2 Au1 S1 97.3(2) . . ?
S2 Au1 S1 176.82(7) . . ?
C1 S1 Au1 105.9(3) . . ?
C3 S2 Au1 94.4(3) . . ?
C2 N1 C1 132.0(7) . . ?
C2 N2 N3 115.6(6) . . ?
C2 N2 Au1 127.0(6) . . ?
N3 N2 Au1 117.3(5) . . ?
C3 N3 N2 117.4(7) . . ?
C3 N4 C46 123.3(7) . . ?
C3 N4 C41 117.6(7) . . ?
C46 N4 C41 117.9(7) . . ?
C1 N5 C53 120.2(7) . . ?
C1 N5 C51 122.8(7) . . ?
C53 N5 C51 116.9(7) . . ?
N5 C1 N1 115.4(7) . . ?
N5 C1 S1 115.6(6) . . ?
N1 C1 S1 128.9(6) . . ?
N2 C2 N1 128.6(7) . . ?
N2 C2 C21 120.1(7) . . ?
N1 C2 C21 111.3(6) . . ?
N3 C3 N4 119.8(7) . . ?
N3 C3 S2 124.4(6) . . ?
N4 C3 S2 115.8(6) . . ?
N6 C4 Au1 178.5(9) . . ?
C22 C21 C26 117.2(8) . . ?
C22 C21 C2 119.7(7) . . ?
C26 C21 C2 122.9(7) . . ?
C23 C22 C21 121.3(8) . . ?
C23 C22 H22 119.3 . . ?
C21 C22 H22 119.3 . . ?
C22 C23 C24 120.7(9) . . ?
C22 C23 H23 119.7 . . ?
C24 C23 H23 119.7 . . ?
C25 C24 C23 119.5(9) . . ?
C25 C24 H24 120.3 . . ?
C23 C24 H24 120.3 . . ?
C24 C25 C26 120.7(9) . . ?
C24 C25 H25 119.6 . . ?
C26 C25 H25 119.6 . . ?
C25 C26 C21 120.6(8) . . ?
C25 C26 H26 119.7 . . ?
C21 C26 H26 119.7 . . ?
N4 C41 C42 115.2(9) . . ?
N4 C41 H41A 108.5 . . ?
C42 C41 H41A 108.5 . . ?
N4 C41 H41B 108.5 . . ?
C42 C41 H41B 108.5 . . ?
H41A C41 H41B 107.5 . . ?
C43 C42 C41 115.6(9) . . ?
C43 C42 H42A 108.4 . . ?
C41 C42 H42A 108.4 . . ?
C43 C42 H42B 108.4 . . ?
C41 C42 H42B 108.4 . . ?
H42A C42 H42B 107.4 . . ?
C42 C43 C44 121.5(12) . . ?
C42 C43 H43A 107.0 . . ?
C44 C43 H43A 107.0 . . ?
C42 C43 H43B 107.0 . . ?
C44 C43 H43B 107.0 . . ?
H43A C43 H43B 106.7 . . ?
C45 C44 C43 122.4(12) . . ?
C45 C44 H44A 106.7 . . ?
C43 C44 H44A 106.7 . . ?
C45 C44 H44B 106.7 . . ?
C43 C44 H44B 106.7 . . ?
H44A C44 H44B 106.6 . . ?
C44 C45 C46 121.0(12) . . ?
C44 C45 H45A 107.1 . . ?
C46 C45 H45A 107.1 . . ?
C44 C45 H45B 107.1 . . ?
C46 C45 H45B 107.1 . . ?
H45A C45 H45B 106.8 . . ?
N4 C46 C45 113.4(9) . . ?
N4 C46 H46A 108.9 . . ?
C45 C46 H46A 108.9 . . ?
N4 C46 H46B 108.9 . . ?
C45 C46 H46B 108.9 . . ?
H46A C46 H46B 107.7 . . ?
C52 C51 N5 114.6(8) . . ?
C52 C51 H51A 108.6 . . ?
N5 C51 H51A 108.6 . . ?
C52 C51 H51B 108.6 . . ?
N5 C51 H51B 108.6 . . ?
H51A C51 H51B 107.6 . . ?
C51 C52 H52A 109.5 . . ?
C51 C52 H52B 109.5 . . ?
H52A C52 H52B 109.5 . . ?
C51 C52 H52C 109.5 . . ?
H52A C52 H52C 109.5 . . ?
H52B C52 H52C 109.5 . . ?
C54 C53 N5 115.3(11) . . ?
C54 C53 H53A 108.4 . . ?
N5 C53 H53A 108.4 . . ?
C54 C53 H53B 108.4 . . ?
N5 C53 H53B 108.4 . . ?
H53A C53 H53B 107.5 . . ?
C53 C54 H54A 109.5 . . ?
C53 C54 H54B 109.5 . . ?
H54A C54 H54B 109.5 . . ?
C53 C54 H54C 109.5 . . ?
H54A C54 H54C 109.5 . . ?
H54B C54 H54C 109.5 . . ?
 
_diffrn_measured_fraction_theta_max    0.969
_diffrn_reflns_theta_full              29.27
_diffrn_measured_fraction_theta_full   0.969
_refine_diff_density_max    3.663
_refine_diff_density_min   -2.815
_refine_diff_density_rms    0.458
